# Supplementary material
Source: publisher site journal article supplement (https://www.dovepress.com/get_supplementary_file.php?f=339114.xlsx)
Supplement: Supplementary file 1 [file get_supplementary_file.php]

## Sheet: Sheet1
Hospital	Sample number	Gender F=Female M=Male	Age	Clinical diagnosis	Operation 1=unilateral 2=total thyroidectomy	T stage	N stage	M stage	Location	解读结果	SNV、indel结果	SNV/indel frequency	ID	Gene mutation/fusion event	Braf mutation frequency	Sample type
China-Japan Friendship Hospital	PM00G18AB0772	M	41	Papillary Thyroid Cancer	1	1	0	0	Left	BRAF exon15:c.T1799A:p.V600E 4.83%		0.0483	1	BRAF	0.0483	Fresh
Xiangya Hospital of Central South University	PM00G19AW0415	F	37	Papillary Thyroid Cancer	1	1	0	0	Left	BRAF	exon15:c.T1799A:p.V600E	3.12%	59	BRAF	3.12%	Fresh
Xiangya Hospital of Central South University	PM00G19AW0978	M		Papillary Thyroid Cancer	1	1	1	0	Left	BRAF	exon15:c.T1799A:p.V600E	1.67%	61	BRAF	1.67%	FFPE
Xiangya Hospital of Central South University	PM00G19AW0412	F	23	Papillary Thyroid Cancer	1	x	1	0	Left	intergenic_JMJD1C_REEP3:RET_12	None	None	66	RET intergenic_JMJD1C_REEP3:RET_12		FFPE
Xiangya Hospital of Central South University	PM00G18AW0802	M	46	Papillary Thyroid Cancer	2	1	1	0	Both	BRAF exon15:c.T1799A:p.V600E 5.22%	BRAF exon15:c.T1799A:p.V600E 5.22%	5.22%	10	BRAF	5.22%	FFPE
Xiangya Hospital of Central South University	PM00G18AW0795	F	30	Papillary Thyroid Cancer	2	1	1	0	Both	BRAF exon15:c.T1799A:p.V600E 14.49%	BRAF exon15:c.T1799A:p.V600E 14.49%	14.49%	12	BRAF	14.49%	FFPE
Xiangya Hospital of Central South University	PM00G18AW0798	F	36	Papillary Thyroid Cancer	2	1	1	0	Left	BRAF exon15:c.T1799A:p.V600E 1.47%	BRAF exon15:c.T1799A:p.V600E 1.47%	1.47%	11	BRAF	1.47%	FFPE
Xiangya Hospital of Central South University	PM00G18AW0867	F		Papillary Thyroid Cancer	2	x	0	0	Both	BRAF exon15:c.T1799A:p.V600E 8.48%	BRAF exon15:c.T1799A:p.V600E 8.48%	8.48%	14	BRAF	8.48%	FFPE
Xiangya Hospital of Central South University	PM00G18AW0866	F		Papillary Thyroid Cancer	2	x	x	0	Left	BRAF exon15:c.T1799A:p.V600E 11.71%	BRAF exon15:c.T1799A:p.V600E 11.71%	11.71%	13	BRAF	11.71%	FFPE
Xiangya Hospital of Central South University	PM00G18AW0910	F	27	Papillary Thyroid Cancer	2	1	0	0	Left	BRAF exon15:c.T1799A:p.V600E 1.42%	BRAF exon15:c.T1799A:p.V600E 1.42%	1.42%	15	BRAF	1.42%	FFPE
Xiangya Hospital of Central South University	PM00G18AW0912	F	36	Papillary Thyroid Cancer	2	1	1	0	Left	BRAF exon15:c.T1799A:p.V600E 23.76%	BRAF exon15:c.T1799A:p.V600E 23.76%	23.76%	16	BRAF	23.76%	Fresh
Xiangya Hospital of Central South University	PM00G19AW0092	M	52	Papillary Thyroid Cancer	2	1	0	0	Left	BRAF exon15:c.T1799A:p.V600E 18.36%		0.1836	19	BRAF	0.1836	Fresh
Xiangya Hospital of Central South University	PM00G19AW0079	F		Papillary Thyroid Cancer	2	1	2	0	Both	BRAF exon15:c.T1799A:p.V600E 2.13%	BRAF exon15:c.T1799A:p.V600E 2.13%	2.13%	21	BRAF	2.13%	Fresh
Xiangya Hospital of Central South University	PM00G19AW0078	F		Papillary Thyroid Cancer	2	1	0	0	Both	BRAF exon15:c.T1799A:p.V600E 6.06%	BRAF exon15:c.T1799A:p.V600E 6.06%	6.06%	22	BRAF	6.06%	Fresh
Xiangya Hospital of Central South University	PM00G19AW0080	F		Papillary Thyroid Cancer	2	1	0	0	Left	BRAF exon15:c.T1799A:p.V600E 1.65%	BRAF exon15:c.T1799A:p.V600E 1.65%	1.65%	20	BRAF	1.65%	Fresh
Xiangya Hospital of Central South University	PM00G19AW0075	F	35	Papillary Thyroid Cancer	2	1	1	0	Both	BRAF exon15:c.T1799A:p.V600E 5.98%	BRAF exon15:c.T1799A:p.V600E 5.98%	5.98%	25	BRAF	5.98%	FFPE
Xiangya Hospital of Central South University	PM00G19AW0085	F	42	Papillary Thyroid Cancer	2	1	1	0	Both	None	None	None	29	None		FFPE
Xiangya Hospital of Central South University	PM00G19AW0074	M	27	Papillary Thyroid Cancer	2	1	0	0	Left	BRAF exon15:c.T1799A:p.V600E 5.12%	BRAF exon15:c.T1799A:p.V600E 5.12%	5.12%	24	BRAF	5.12%	Fresh
Xiangya Hospital of Central South University	PM00G19AW0287	M	53	Papillary Thyroid Cancer	2	x	1	0	Both	BRAF	exon15:c.T1799A:p.V600E	5.73%	35	BRAF	5.73%	Fresh
Xiangya Hospital of Central South University	PM00G19AW0196	F	34	Papillary Thyroid Cancer	2	1	2	0	Left	BRAF	exon15:c.T1799A:p.V600E	2.81%	31	BRAF	2.81%	Fresh
Xiangya Hospital of Central South University	PM00G19AW0286	F	26	Papillary Thyroid Cancer	2	1	2	0	Both	BRAF	exon15:c.T1799A:p.V600E	10.87%	37	BRAF	10.87%	Fresh
Xiangya Hospital of Central South University	PM00G19AW0996	F	65	Papillary Thyroid Cancer	2	1	0	0	Left	BRAF	exon15:c.T1799A:p.V600E	4.88%	36	BRAF	4.88%	Fresh
Xiangya Hospital of Central South University	PM00G19AW0990	F	53	Papillary Thyroid Cancer	2	1	1	0	Left	BRAF	exon15:c.T1799A:p.V600E	7.61%	42	BRAF	7.61%	Fresh
Xiangya Hospital of Central South University	PM00G19AW0987	M	36	Papillary Thyroid Cancer	2	2	2	0	Both	BRAF	exon15:c.T1799A:p.V600E	31.86%	48	BRAF	31.86%	Fresh
Xiangya Hospital of Central South University	PM00G19AW0993	M	30	Papillary Thyroid Cancer	2	1	2	0	Left	BRAF	exon15:c.T1799A:p.V600E	23.31%	43	BRAF	23.31%	Fresh
Xiangya Hospital of Central South University	PM00G19AW0982	M	42	Papillary Thyroid Cancer	2	x	1	0	Both	BRAF	exon15:c.T1799A:p.V600E	8.08%	50	BRAF	8.08%	Fresh
Xiangya Hospital of Central South University	PM00G19AW0416	F	54	Papillary Thyroid Cancer	2	1	1	0	Both	BRAF	exon15:c.T1799A:p.V600E	25.04%	54	BRAF	25.04%	Fresh
Xiangya Hospital of Central South University	PM00G19AW0417	M	42	Papillary Thyroid Cancer	2	1	1	0	Both	BRAF	exon15:c.T1799A:p.V600E	6.82%	55	BRAF	6.82%	Fresh
Xiangya Hospital of Central South University	PM00G19AW0418	F	39	Papillary Thyroid Cancer	2	1	1	0	Both	BRAF	exon15:c.T1799A:p.V600E	4.68%	56	BRAF	4.68%	Fresh
Xiangya Hospital of Central South University	PM00G19AW0421	M	36	Papillary Thyroid Cancer	2	1	2	0	Both	BRAF	exon15:c.T1799A:p.V600E	18.69%	57	BRAF	18.69%	Fresh
Xiangya Hospital of Central South University	PM00G19AW0979	F		Papillary Thyroid Cancer	2	1	2	0	Both	BRAF	exon15:c.T1799A:p.V600E	8.62%	58	BRAF	8.62%	Fresh
Xiangya Hospital of Central South University	PM00G19AW0985	F	53	Papillary Thyroid Cancer	2	1	2	0	Left	BRAF ；TERT	c.T1799A:p.V600E ；C228T	20% ；16.07%	49	BRAF TERT	0.2	Fresh
Xiangya Hospital of Central South University	PM00G19AW0419	F	52	Papillary Thyroid Cancer	2	x	1	0	Left	BRAF	exon15:c.T1799A:p.V600E	1.51%	60	BRAF	1.51%	Fresh
Xiangya Hospital of Central South University	PM00G19AW0973	F	25	Papillary Thyroid Cancer	2	1	2	0	Left	BRAF ；PIK3CA	c.T1799A:p.V600E； exon10:c.G1633A:p.E545K	7.23%；6.43%	62	BRAF PIK3CA	0.0723	Fresh
Xiangya Hospital of Central South University	PM00G19AW0974	F	65	Papillary Thyroid Cancer	2	1	0	0	Left	BRAF	exon15:c.T1799A:p.V600E	3.17%	64	BRAF	3.17%	Fresh
Xiangya Hospital of Central South University	PM00G19AW0409	M	37	Papillary Thyroid Cancer	2	1	1	0	Both	BRAF	exon15:c.T1799A:p.V600E	33.77%	63	BRAF	33.77%	FFPE
Xiangya Hospital of Central South University	PM00G19AW0411	F	56	Papillary Thyroid Cancer	2	2	0	0	Left	BRAF	exon15:c.T1799A:p.V600E	2.21%	65	BRAF	2.21%	FFPE
Xiangya Hospital of Central South University	PM00G19AW0413	F	43	Papillary Thyroid Cancer	2	1	2	0	Both	KRAS ；BRAF	c.G34A:p.G12S； c.T1799A:p.V600E	1.17% ；1.13%	67	BRAF KRAS	0.0113	FFPE
Xiangya Hospital of Central South University	PM00G19AW0965	F	40	Papillary Thyroid Cancer	2	1	0	0	Both	BRAF	exon15:c.T1799A:p.V600E	1.18%	69	BRAF	1.18%	FFPE
Xiangya Hospital of Central South University	PM00G18AW0648	F	34	Papillary Thyroid Cancer	2	x	0	0	Right	BRAF exon15:c.T1799A:p.V600E 6.53%	BRAF exon15:c.T1799A:p.V600E 6.53%	6.53%	5	BRAF	6.53%	Fresh
Xiangya Hospital of Central South University	PM00G18AW0646	M	41	Papillary Thyroid Cancer	2	1	2	0	Right	BRAF exon15:c.T1799A:p.V600E 3.17%	BRAF exon15:c.T1799A:p.V600E 3.17%	3.17%	6	BRAF	3.17%	FFPE
Xiangya Hospital of Central South University	PM00G18AW0647	M	44	Papillary Thyroid Cancer	2	1	1	0	Right	BRAF exon15:c.T1799A:p.V600E 5.13%	BRAF exon15:c.T1799A:p.V600E 5.13%	5.13%	7	BRAF	5.13%	Fresh
Xiangya Hospital of Central South University	PM00G18AW0804	M	27	Papillary Thyroid Cancer	2	x	x	0	Right	BRAF exon15:c.T1799A:p.V600E 15.06%	BRAF exon15:c.T1799A:p.V600E 15.06%	15.06%	9	BRAF	15.06%	Fresh
Xiangya Hospital of Central South University	PM00G18AW0998	F	45	Papillary Thyroid Cancer	2	1	0	0	Right	BRAF exon15:c.T1799A:p.V600E 14.78%	BRAF exon15:c.T1799A:p.V600E 14.78%	14.78%	18	BRAF	14.78%	FFPE
Xiangya Hospital of Central South University	PM00G19AW0077	F		Papillary Thyroid Cancer	2	x	0	0	Right	None	None	None	23	None		FFPE
Xiangya Hospital of Central South University	PM00G19AW0999	M	51	Papillary Thyroid Cancer	2	x	x	0	Right	BRAF exon15:c.T1799A:p.V600E 12.95%	BRAF exon15:c.T1799A:p.V600E 12.95%	12.95%	26	BRAF	12.95%	FFPE
Xiangya Hospital of Central South University	PM00G19AW0084	M		Papillary Thyroid Cancer	2	2	2	0	Right	BRAF	exon15:c.T1799A:p.V600E	1.33%	28	BRAF	1.33%	FFPE
Xiangya Hospital of Central South University	PM00G19AW0197	F	59	Papillary Thyroid Cancer	2	1	0	0	Right	BRAF	exon15:c.T1799A:p.V600E	3.51%	30	BRAF	3.51%	FFPE
Xiangya Hospital of Central South University	PM00G19AW0195	F	34	Papillary Thyroid Cancer	2	1	1	0	Right	BRAF	exon15:c.T1799A:p.V600E	19.43%	32	BRAF	19.43%	Fresh
Xiangya Hospital of Central South University	PM00G19AW0288	F	32	Papillary Thyroid Cancer	2	1	1	0	Right	BRAF	exon15:c.T1799A:p.V600E	4.15%	38	BRAF	4.15%	FFPE
Xiangya Hospital of Central South University	PM00G19AW0194R	F	74	Papillary Thyroid Cancer	2	1	0	0	Right	BRAF	exon15:c.T1799A:p.V600E	12.91%	39	BRAF	12.91%	Fresh
Xiangya Hospital of Central South University	PM00G19AW0995	M	56	Papillary Thyroid Cancer	2	2	2	0	Right	BRAF	exon15:c.T1799A:p.V600E	18.43%	40	BRAF	18.43%	Fresh
Xiangya Hospital of Central South University	PM00G19AW0289	F	26	Papillary Thyroid Cancer	2	3	1	0	Right	BRAF	exon15:c.T1799A:p.V600E	8.42%	41	BRAF	8.42%	Fresh
Xiangya Hospital of Central South University	PM00G19AW0991	F	26	Papillary Thyroid Cancer	2	1	2	0	Right	BRAF	exon15:c.T1799A:p.V600E	13.23%	44	BRAF	13.23%	Fresh
Xiangya Hospital of Central South University	PM00G19AW0992	M	50	Papillary Thyroid Cancer	2	3	2	0	Right	BRAF	exon15:c.T1799A:p.V600E	15.35%	45	BRAF	15.35%	Fresh
Xiangya Hospital of Central South University	PM00G19AW0315	M	47	Papillary Thyroid Cancer	2	1	1	0	Right	BRAF	exon15:c.T1799A:p.V600E	2.99%	47	BRAF	2.99%	Fresh
Xiangya Hospital of Central South University	PM00G19AW0984	F	40	Papillary Thyroid Cancer	2	x	1	0	Right	BRAF	exon15:c.T1799A:p.V600E	15.39%	52	BRAF	15.39%	Fresh
Xiangya Hospital of Central South University	PM00G19AW0408	F	25	Papillary Thyroid Cancer	2	1	1	0	Right	NCOA4_e8:RET_e12	None	None	68	RET NCOA4		Fresh
Xiangya Hospital of Central South University	PM00G19AW0969	F	33	Papillary Thyroid Cancer	2	1	1	0	Right	BRAF	exon15:c.T1799A:p.V600E	2.6%	70	BRAF	2.6%	Fresh
Xiangya Hospital of Central South University	PM00G19AW0098	F	46	Papillary Thyroid Cancer	2	1	1	0	Left	BRAF exon15:c.T1799A:p.V600E 2.56%	BRAF exon15:c.T1799A:p.V600E 2.56%	2.56%	75	BRAF	2.56%	Fresh
Xiangya Hospital of Central South University	PM00G19AW0076	M	43	Papillary Thyroid Cancer	2	2	2	0	Both	BRAF exon15:c.T1799A:p.V600E 0.68%	BRAF exon15:c.T1799A:p.V600E 0.68%	0.68%	73	BRAF	0.68%	Fresh
Xiangya Hospital of Central South University	PM00G19AW0073	F	28	Papillary Thyroid Cancer	2	1	2	0	Both	BRAF exon15:c.T1799A:p.V600E 22.04%	BRAF exon15:c.T1799A:p.V600E 22.04%	22.04%	74	BRAF	22.04%	FFPE
Xiangya Hospital of Central South University	PM00G18AW0799	M	55	Papillary Thyroid Cancer	2	1	1	0	Left	None	None	None	78	None		Fresh
Xiangya Hospital of Central South University	PM00G18AW0801	F	50	Papillary Thyroid Cancer	2	1	0	0	Right	BRAF exon15:c.T1799A:p.V600E 3.42%	BRAF exon15:c.T1799A:p.V600E 3.42%	3.42%	76	BRAF	3.42%	Fresh
Xiangya Hospital of Central South University	PM00G18AW0800	M	33	Papillary Thyroid Cancer	2	1	0	0	Right	KRAS exon3:c.C181A:p.Q61K 1.3%	KRAS exon3:c.C181A:p.Q61K 1.3%	1.3%	77	KRAS		Fresh
Xiangya Hospital of Central South University	PM00G18AW0796	M	36	Papillary Thyroid Cancer	2	1	2	0	Right	BRAF exon15:c.T1799A:p.V600E 9.27%	BRAF exon15:c.T1799A:p.V600E 9.27%	9.27%	79	BRAF	9.27%	Fresh
Cancer Hospital Chinese Academy of Medical Sciences	PM00G18AB1007	M	55	Papillary Thyroid Cancer	1	1	1	0	Left	BRAF:NM_004333:exon15:c.T1799A:p.V600E 14.05%	BRAF:NM_004333:exon15:c.T1799A:p.V600E	14.05%	85	BRAF	14.05%	FFPE
Cancer Hospital Chinese Academy of Medical Sciences	PM00G18AB1008	M	28	Papillary Thyroid Cancer	1	1	0	0	Left	BRAF c.T1799A:p.V600E 1.13%	BRAF c.T1799A:p.V600E	1.13%	86	BRAF	1.13%	Fresh
Cancer Hospital Chinese Academy of Medical Sciences	PM00G19AB0111	M	45	Papillary Thyroid Cancer	2	4	0	0	Left	BRAF TERT	BRAF exon15:c.T1799A:p.V600E TERT C250T	41.66% 46.11%	92	BRAF TERT	0.4166	Fresh
Cancer Hospital Chinese Academy of Medical Sciences	PM00G19AB0098	F	67	Papillary Thyroid Cancer	2	4	2	0	Left	BRAF TERT	BRAF exon15:c.T1799A:p.V600E TERT C228T	14.45% 4.83%	94	BRAF TERT	0.1445	Fresh
Cancer Hospital Chinese Academy of Medical Sciences	PM00G18AB0774	M	64	Papillary Thyroid Cancer	2	3	0	0	Both	8		4.83%; 42.52%	80	BRAF TERT	0.0483	Fresh
Cancer Hospital Chinese Academy of Medical Sciences	PM00G18AB0814	M	35	Papillary Thyroid Cancer	2	1	1	0	Both	BRAF exon15:c.T1799A:p.V600E 20.10%	BRAF exon15:c.T1799A:p.V600E	20.10%	81	BRAF	20.10%	Fresh
Cancer Hospital Chinese Academy of Medical Sciences	PM00G18AB1084	M	30	Papillary Thyroid Cancer	2	x	1	0	Both	BRAF exon15:c.T1799A:p.V600E 26.10%	BRAF exon15:c.T1799A:p.V600E	26.10%	88	BRAF	26.10%	Fresh
Cancer Hospital Chinese Academy of Medical Sciences	PM00G18AB1086	F	53	Papillary Thyroid Cancer	2	4	2	0	Both	RET ERC1_16:RET_12			91	RET ERC1		Fresh
The First People's Hospital of Yunnan Provience	PM00G18AE0166	F	48	Papillary Thyroid Cancer	1	x	1	0	Left	BRAF exon15:c.T1799A:p.V600E 18.79%	BRAF exon15:c.T1799A:p.V600E 18.79%	18.79%	98	BRAF	18.79%	Fresh
The First People's Hospital of Yunnan Provience	PM00G18AE0165	F	36	Papillary Thyroid Cancer	1	x	0	0	Left	BRAF exon15:c.T1799A:p.V600E 5.62%	BRAF exon15:c.T1799A:p.V600E 5.62%	5.62%	99	BRAF	5.62%	Fresh
The First People's Hospital of Yunnan Provience	PM00G18AE0241	F	62	Papillary Thyroid Cancer	2	x	0	0	Left	BRAF exon15:c.T1799A:p.V600E	36.12%	36.12%	107	BRAF	36.12%	Fresh
The First People's Hospital of Yunnan Provience	PM00G18AE0240	F	51	Papillary Thyroid Cancer	2	x	1	0	Left	None			108	None		FFPE
The First People's Hospital of Yunnan Provience	PM00G18AE0253	F	51	Papillary Thyroid Cancer	2	x	0	0	Left	None	None	None	115	None		FFPE
The First People's Hospital of Yunnan Provience	PM00G18AE0310	F	31	Papillary Thyroid Cancer	2	x	1	0	Left	BRAF exon15:c.T1799A:p.V600E 4.92%	BRAF exon15:c.T1799A:p.V600E	4.92%	118	BRAF	4.92%	FFPE
The First People's Hospital of Yunnan Provience	PM00G18AE0361	F	34	Papillary Thyroid Cancer	2	x	0	0	Left	BRAF exon15:c.T1799A:p.V600E 0.88%	BRAF exon15:c.T1799A:p.V600E	0.88%	126	BRAF	0.88%	FFPE
The First People's Hospital of Yunnan Provience	PM00G18AE0167	F	79	Papillary Thyroid Cancer	2	x	0	0	Both	None	None	None	100	None		FFPE
The First People's Hospital of Yunnan Provience	PM00G18AE0245	F	39	Papillary Thyroid Cancer	2	x	0	0	Both	BRAF exon15:c.T1799A:p.V600E 10.81%		0.1081	102	BRAF	0.1081	Fresh
The First People's Hospital of Yunnan Provience	PM00G18AE0256	F	33	Papillary Thyroid Cancer	2	x	2	0	Both	BRAF exon15:c.T1799A:p.V600E 2.05%	BRAF exon15:c.T1799A:p.V600E	2.05%	113	BRAF	2.05%	FFPE
The First People's Hospital of Yunnan Provience	PM00G18AE0311	F	34	Papillary Thyroid Cancer	2	x	0	0	Both	BRAF exon15:c.T1799A:p.V600E 0.57%	BRAF exon15:c.T1799A:p.V600E 0.57%	0.57%	119	BRAF	0.57%	Fresh
The First People's Hospital of Yunnan Provience	PM00G18AE0304	M	54	Papillary Thyroid Cancer	2	x	2	0	Both	None			120	None		Fresh
The First People's Hospital of Yunnan Provience	PM00G18AE0279	M	35	Papillary Thyroid Cancer	2	x	1	0	Both	BRAF exon15:c.T1799A:p.V600E 14.02%		0.1402	124	BRAF	0.1402	Fresh
The First People's Hospital of Yunnan Provience	PM00G18AE0372	F	34	Papillary Thyroid Cancer	2	x	2	0	Both	BRAF exon15:c.T1799A:p.V600E 3.04%		0.0304	125	BRAF	0.0304	Fresh
The First People's Hospital of Yunnan Provience	PM00G18AE0193	F	33	Papillary Thyroid Cancer	2	x	0	0	Right	BRAF exon15:c.T1799A:p.V600E 0.56%	BRAF exon15:c.T1799A:p.V600E	0.56%	101	BRAF	0.56%	Fresh
The First People's Hospital of Yunnan Provience	PM00G18AE0196	F	32	Papillary Thyroid Cancer	2	x	2	0	Right	BRAF:c.T1799A:p.V600E 5.24%		0.0524	103	BRAF	0.0524	Fresh
The First People's Hospital of Yunnan Provience	PM00G18AE0195	F	31	Papillary Thyroid Cancer	2	x	0	0	Right	None			104	None		Fresh
The First People's Hospital of Yunnan Provience	PM00G18AE0243	F	26	Papillary Thyroid Cancer	2	x	0	0	Right	None			106	None		Fresh
The First People's Hospital of Yunnan Provience	PM00G18AE0238	F	52	Papillary Thyroid Cancer	2	x	0	0	Right	BRAF exon15:c.T1799A:p.V600E 0.94%	BRAF exon15:c.T1799A:p.V600E	0.94%	109	BRAF	0.94%	Fresh
The First People's Hospital of Yunnan Provience	PM00G18AE0267	M	41	Papillary Thyroid Cancer	2	x	2	0	Right	RET NCOA4_8:RET_9 RET CELF2_9:RET_10			110	RET NCOA4 CELF2		Fresh
The First People's Hospital of Yunnan Provience	PM00G18AE0259	F	30	Papillary Thyroid Cancer	2	x	2	0	Right	BRAF exon15:c.T1799A:p.V600E 10.49%	BRAF exon15:c.T1799A:p.V600E	10.49%	112	BRAF	10.49%	Fresh
The First People's Hospital of Yunnan Provience	PM00G18AE0258	M	50	Papillary Thyroid Cancer	2	x	0	0	Right	BRAF exon15:c.T1799A:p.V600E 1.72%	BRAF exon15:c.T1799A:p.V600E	1.72%	114	BRAF	1.72%	Fresh
The First People's Hospital of Yunnan Provience	PM00G18AE0252	F	62	Papillary Thyroid Cancer	2	x	1	0	Right	BRAF exon15:c.T1799A:p.V600E 0.11%	BRAF exon15:c.T1799A:p.V600E	0.11%	116	BRAF	0.11%	Fresh
The First People's Hospital of Yunnan Provience	PM00G18AE0312	M	45	Papillary Thyroid Cancer	2	x	1	0	Right	BRAF exon15:c.T1799A:p.V600E 0.54%	BRAF exon15:c.T1799A:p.V600E	0.54%	117	BRAF	0.54%	Fresh
The First People's Hospital of Yunnan Provience	PM00G18AE0303	F	61	Papillary Thyroid Cancer	2	x	1	0	Right	None			121	None		Fresh
West China Hospital, Sichuan University	PM00G19AL0113	F	31	Papillary Thyroid Cancer	1	4	2	0	Left	BRAF	exon15:c.T1799A:p.V600E	25.03%	136	BRAF	25.03%	Fresh
West China Hospital, Sichuan University	PM00G19AL0097	F	65	Papillary Thyroid Cancer	2	4	2	0	Left	BRAF	exon15:c.T1799A:p.V600E	38.34%	135	BRAF	38.34%	Fresh
West China Hospital, Sichuan University	PM00G18AL0197	F	32	Papillary Thyroid Cancer	2	1	2	0	Left	BRAF exon15:c.T1799A:p.V600E 34.72%	BRAF exon15:c.T1799A:p.V600E 34.72%	34.72%	138	BRAF	34.72%	Fresh
West China Hospital, Sichuan University	PM00G18AL0196	F	31	Papillary Thyroid Cancer	2	3	1	0	Left	BRAF exon15:c.T1799A:p.V600E 36.07%	BRAF exon15:c.T1799A:p.V600E 36.07%	36.07%	139	BRAF	36.07%	Fresh
West China Hospital, Sichuan University	PM00G19AL0104	F	29	Papillary Thyroid Cancer	2	4	2	0	Left	CCDC6_1:RET_12	exon15:c.T1799A:p.V600E	36%	142	BRAF RET CCDC6	0.36	Fresh
West China Hospital, Sichuan University	PM00G19AL0106	F	6	Papillary Thyroid Cancer	2	2	2	0	Left	NCOA4_e8:RET_e12	None	None	146	RET NCOA4		Fresh
West China Hospital, Sichuan University	PM00G19AL0115	F	36	Papillary Thyroid Cancer	2	3	2	0	Left	RET ACBD5_11:RET_11	exon15:c.T1799A:p.V600E	14.77%	147	BRAF RET ACBD5	0.1477	Fresh
West China Hospital, Sichuan University	PM00G19AL0100	F	42	Papillary Thyroid Cancer	2	2	2	0	Both	CCDC6_1:RET_12			133	RET CCDC6		Fresh
West China Hospital, Sichuan University	PM00G19AL0102	M	28	Papillary Thyroid Cancer	2	4	2	0	Both	CCDC6_8:RET_11	exon15:c.T1799A:p.V600E	15.65%	134	BRAF RET CCDC6	0.1565	Fresh
West China Hospital, Sichuan University	PM00G18AL0198	F	42	Papillary Thyroid Cancer	2	1	2	0	Left	None	None	None	159	None		Fresh
West China Hospital, Sichuan University	PM00G19AL0105	F	62	Papillary Thyroid Cancer	2	4	1	0	Both	RET ACBD5_11:RET_11	c.T1799A:p.V600E ；C228T	35.04% ；32.37%	148	BRAF TERT RET ACBD5	0.3504	Fresh
West China Hospital, Sichuan University	PM00G19AL0118	F	24	Papillary Thyroid Cancer	2	4	2	0	Both	RET CCDC6_1:RET_12	BRAF exon15:c.T1799A:p.V600E 20.05%	20.05%	151	BRAF RET CCDC6	0.2005	Fresh
West China Hospital, Sichuan University	PM00G19AL0119	M	48	Papillary Thyroid Cancer	2	3	2	0	Right	BRAF exon15:c.T1799A:p.V600E 19.9%	BRAF exon15:c.T1799A:p.V600E 19.9%	19.9%	140	BRAF	19.9%	Fresh
West China Hospital, Sichuan University	PM00G19AL0120	M	71	Papillary Thyroid Cancer	2	4	2	0	Right	BRAF exon15:c.T1799A:p.V600E 27.05%	BRAF exon15:c.T1799A:p.V600E 27.05%	27.05%	141	BRAF	27.05%	Fresh
West China Hospital, Sichuan University	PM00G19AL0117	F	17	Papillary Thyroid Cancer	2	2	2	0	Right	BRAF exon15:c.T1799A:p.V600E 36.3%	BRAF exon15:c.T1799A:p.V600E 36.3%	36.3%	145	BRAF	36.3%	Fresh
West China Hospital, Sichuan University	PM00G19AL0103	F	45	Papillary Thyroid Cancer	2	3	1	0	Right	C10orf118_15:RET_12	BRAF exon15:c.T1799A:p.V600E	20.33%	150	BRAF RET C10orf118_15	20.33%	Fresh
West China Hospital, Sichuan University	PM00G19AL0094	M	37	Papillary Thyroid Cancer	2	4	2	0	Right	CCDC6_1:RET_12	None	None	152	RET CCDC6		FFPE
West China Hospital, Sichuan University	PM00G19AL0099	F	26	Papillary Thyroid Cancer	2	3	2	0	Right	CCDC6_1:RET_12			153	RET CCDC6		FFPE
West China Hospital, Sichuan University	PM00G19AL0112	M	28	Papillary Thyroid Cancer	2	2	2	0	Right	CCDC6_8:RET_11	None	None	155	RET CCDC6		FFPE
West China Hospital, Sichuan University	PM00G19AL0107	F	53	Papillary Thyroid Cancer	2	3	2	0	Right	intergenic_JMJD1C_REEP3:RET_12	exon15:c.T1799A:p.V600E	16.94%	156	BRAF RET intergenic_JMJD1C_REEP3:RET_12	0.1694	FFPE
West China Hospital, Sichuan University	PM00G19AL0114	F	37	Papillary Thyroid Cancer	2	2	2	0	Right	NCOA4_e8:RET_e12	exon15:c.T1799A:p.V600E	11.4%	157	BRAF RET NCOA4	0.114	Fresh
People's Hospital of Shanxi Provience	PM00G18AY0129	F	44	Papillary Thyroid Cancer	1	1	1	0	Left	BRAF exon15:c.T1799A:p.V600E 8.49%	BRAF exon15:c.T1799A:p.V600E	8.49%	161	BRAF	8.49%	FFPE
People's Hospital of Shanxi Provience	PM00G18AY0121	F	31	Papillary Thyroid Cancer	1	1	1	0	Left	BRAF exon15:c.T1799A:p.V600E		0.2008	162	BRAF	0.2008	Fresh
People's Hospital of Shanxi Provience	PM00G19AY0037	F	48	Papillary Thyroid Cancer	1	1	0	0	Left	BRAF	BRAF exon15:c.T1799A:p.V600E	4.39%	169	BRAF	4.39%	FFPE
People's Hospital of Shanxi Provience	PM00G19AY0096	F	50	Papillary Thyroid Cancer	1	1	0	0	Left	BRAF TERT	BRAF exon15:c.T1799A:p.V600E TERT C250T	21.01% 16.47%	177	BRAF TERT	0.2101	Fresh
People's Hospital of Shanxi Provience	PM00G19AY0101	F	37	Papillary Thyroid Cancer	1	1	0	0	Left	BRAF	BRAF exon15:c.T1799A:p.V600E	2.30%	180	BRAF	2.30%	Fresh
People's Hospital of Shanxi Provience	PM00G19AY0108	F	24	Papillary Thyroid Cancer	1	1	1	0	Left	BRAF	BRAF exon15:c.T1799A:p.V600E	32.21%	181	BRAF	32.21%	Fresh
People's Hospital of Shanxi Provience	PM00G19AY0098	F	46	Papillary Thyroid Cancer	1	1	0	0	Left	BRAF	BRAF exon15:c.T1799A:p.V600E	20.25%	182	BRAF	20.25%	Fresh
People's Hospital of Shanxi Provience	PM00G19AY0104	F	50	Papillary Thyroid Cancer	1	1	2	0	Left	BRAF	BRAF exon15:c.T1799A:p.V600E	15.20%	186	BRAF	15.20%	Fresh
People's Hospital of Shanxi Provience	PM00G19AY0117	F	51	Papillary Thyroid Cancer	1	3	0	0	Left	BRAF	BRAF exon15:c.T1799A:p.V600E	20.76%	189	BRAF	20.76%	Fresh
People's Hospital of Shanxi Provience	PM00G19AY0118	F	51	Papillary Thyroid Cancer	1	1	0	0	Left	BRAF	BRAF exon15:c.T1799A:p.V600E	0.75%	190	BRAF	0.75%	Fresh
People's Hospital of Shanxi Provience	PM00G19AY0125	F	56	Papillary Thyroid Cancer	1	x	0	0	Left	BRAF	exon15:c.T1799A:p.V600E	0.75%	196	BRAF	0.75%	Fresh
People's Hospital of Shanxi Provience	PM00G19AY0042	F	23	Papillary Thyroid Cancer	2	2	2	0	Left	None	None	None	168	None		Fresh
People's Hospital of Shanxi Provience	PM00G19AY0102	F	57	Papillary Thyroid Cancer	2	3	1	0	Left	BRAF	BRAF exon15:c.T1799A:p.V600E	18.53%	187	BRAF	18.53%	Fresh
People's Hospital of Shanxi Provience	PM00G19AY0122	F	48	Papillary Thyroid Cancer	2	3	0	0	Left	BRAF	BRAF exon15:c.T1799A:p.V600E	21.66%	193	BRAF	21.66%	FFPE
People's Hospital of Shanxi Provience	PM00G19AY0123	F	39	Papillary Thyroid Cancer	2	3	2	0	Left	BRAF	BRAF exon15:c.T1799A:p.V600E	0.85%	194	BRAF	0.85%	Fresh
People's Hospital of Shanxi Provience	PM00G19AY0044	M	47	Papillary Thyroid Cancer	2	1	0	0	Both	BRAF	BRAF exon15:c.T1799A:p.V600E	12.38%	166	BRAF	12.38%	Fresh
People's Hospital of Shanxi Provience	PM00G19AY0078	M	48	Papillary Thyroid Cancer	2	3	2	0	Both	CCDC6_1:RET_12	None	None	170	RET CCDC6		Fresh
People's Hospital of Shanxi Provience	PM00G19AY0077	F	30	Papillary Thyroid Cancer	2	x	2	0	Both	None	None	None	172	None		Fresh
People's Hospital of Shanxi Provience	PM00G19AY0100	M	55	Papillary Thyroid Cancer	2	x	1	0	Both	BRAF	BRAF exon15:c.T1799A:p.V600E	11.76%	179	BRAF	11.76%	Fresh
People's Hospital of Shanxi Provience	PM00G19AY0116	F	39	Papillary Thyroid Cancer	2	1	1	0	Both	BRAF	BRAF exon15:c.T1799A:p.V600E	18.50%	188	BRAF	18.50%	Fresh
People's Hospital of Shanxi Provience	PM00G19AY0127	F	47	Papillary Thyroid Cancer	2	2	2	0	Both	BRAF	exon15:c.T1799A:p.V600E	39.08%	198	BRAF	39.08%	Fresh
People's Hospital of Shanxi Provience	PM00G18AY0126	F	28	Papillary Thyroid Cancer	2	x	1	0	Right	BRAF exon15:c.T1799A:p.V600E 34.65%	BRAF exon15:c.T1799A:p.V600E	34.65%	160	BRAF	34.65%	FFPE
People's Hospital of Shanxi Provience	PM00G19AY0048	F	56	Papillary Thyroid Cancer	2	1	0	0	Right	BRAF	exon15:c.T1799A:p.V600E	3.99%	164	BRAF	3.99%	FFPE
People's Hospital of Shanxi Provience	PM00G19AY0045	F	37	Papillary Thyroid Cancer	2	1	2	0	Right	RET ACBD5_11:RET_11	None	None	165	RET ACBD5		FFPE
People's Hospital of Shanxi Provience	PM00G19AY0043	M	52	Papillary Thyroid Cancer	2	1	2	0	Right	BRAF	BRAF exon15:c.T1799A:p.V600E	11.35%	167	BRAF	11.35%	FFPE
People's Hospital of Shanxi Provience	PM00G19AY0072	F	50	Papillary Thyroid Cancer	2	3	2	0	Right	BRAF	BRAF exon15:c.T1799A:p.V600E	21.91%	176	BRAF	21.91%	FFPE
People's Hospital of Shanxi Provience	PM00G19AY0106	F	57	Papillary Thyroid Cancer	2	1	0	0	Right	BRAF	BRAF exon15:c.T1799A:p.V600E	9.47%	184	BRAF	9.47%	FFPE
People's Hospital of Shanxi Provience	PM00G19AY0126	F	56	Papillary Thyroid Cancer	2	3	1	0	Right	BRAF	exon15:c.T1799A:p.V600E	1.15%	197	BRAF	1.15%	FFPE
Shanxi Bethune Hospital, Shanxi Academy of Medical Sciences	PM00G18AY0104	F	56	Papillary Thyroid Cancer	1	1	0	0	Left	None			200	None		FFPE
Shanxi Bethune Hospital, Shanxi Academy of Medical Sciences	PM00G18AY0088	M	26	Papillary Thyroid Cancer	1	1	1	0	Left	None			208	None		FFPE
Shanxi Bethune Hospital, Shanxi Academy of Medical Sciences	PM00G18AY0135	F	28	Papillary Thyroid Cancer	1	1	1	0	Left	BRAF exon15:c.T1799A:p.V600E 14.62%	BRAF exon15:c.T1799A:p.V600E	14.62%	210	BRAF	14.62%	FFPE
Shanxi Bethune Hospital, Shanxi Academy of Medical Sciences	PM00G19AY0041	F	44	Papillary Thyroid Cancer	1	2	2	0	Left	BRAF	BRAF exon15:c.T1799A:p.V600E	36.14%	227	BRAF	36.14%	FFPE
Shanxi Bethune Hospital, Shanxi Academy of Medical Sciences	PM00G19AY0039	M	38	Papillary Thyroid Cancer	1	1	0	0	Left	BRAF	BRAF exon15:c.T1799A:p.V600E	0.44%	229	BRAF	0.44%	FFPE
Shanxi Bethune Hospital, Shanxi Academy of Medical Sciences	PM00G19AY0071	F	26	Papillary Thyroid Cancer	1	1	0	0	Left	BRAF	exon15:c.T1799A:p.V600E	1.34%	232	BRAF	1.34%	FFPE
Shanxi Bethune Hospital, Shanxi Academy of Medical Sciences	PM00G19AY0035	F	46	Papillary Thyroid Cancer	1	1	0	0	Left	BRAF	BRAF exon15:c.T1799A:p.V600E	14.15%	235	BRAF	14.15%	FFPE
Shanxi Bethune Hospital, Shanxi Academy of Medical Sciences	PM00G19AY0057	F	51	Papillary Thyroid Cancer	1	2	1	0	Left	BRAF	BRAF exon15:c.T1799A:p.V600E	37.33%	238	BRAF	37.33%	FFPE
Shanxi Bethune Hospital, Shanxi Academy of Medical Sciences	PM00G18AY0103	F	49	Papillary Thyroid Cancer	2	1	2	0	Left	BRAF exon15:c.T1799A:p.V600E		0.0423	201	BRAF	0.0423	FFPE
Shanxi Bethune Hospital, Shanxi Academy of Medical Sciences	PM00G18AY0056	F	34	Papillary Thyroid Cancer	2	1	1	0	Left	BRAF exon15:c.T1799A:p.V600E	BRAF exon15:c.T1799A:p.V600E	4.51%	204	BRAF	4.51%	FFPE
Shanxi Bethune Hospital, Shanxi Academy of Medical Sciences	PM00G18AY0114	M	53	Papillary Thyroid Cancer	2	1	1	0	Left	BRAF exon15:c.T1799A:p.V600E 38.27%	BRAF exon15:c.T1799A:p.V600E	38.27%	212	BRAF	38.27%	FFPE
Shanxi Bethune Hospital, Shanxi Academy of Medical Sciences	PM00G18AY0112	M	29	Papillary Thyroid Cancer	2	1	1	0	Left	BRAF exon15:c.T1799A:p.V600E 5.31%	BRAF exon15:c.T1799A:p.V600E	5.31%	213	BRAF	5.31%	FFPE
Shanxi Bethune Hospital, Shanxi Academy of Medical Sciences	PM00G18AY0128	F	46	Papillary Thyroid Cancer	2	1	1	0	Left	BRAF exon15:c.T1799A:p.V600E		0.1071	220	BRAF	0.1071	FFPE
Shanxi Bethune Hospital, Shanxi Academy of Medical Sciences	PM00G18AY0123	F	34	Papillary Thyroid Cancer	2	1	1	0	Left	RET CCDC6_1:RET_12			222	RET CCDC6		FFPE
Shanxi Bethune Hospital, Shanxi Academy of Medical Sciences	PM00G19AY0036	F	63	Papillary Thyroid Cancer	2	2	0	0	Left	HRAS	HRAS exon3: c.C181A:p.Q61K	12.25%	231	HRAS		FFPE
Shanxi Bethune Hospital, Shanxi Academy of Medical Sciences	PM00G18AY0101	M	55	Papillary Thyroid Cancer	2	1	1	0	Both	BRAF exon15:c.T1799A:p.V600E		0.0172	202	BRAF	0.0172	FFPE
Shanxi Bethune Hospital, Shanxi Academy of Medical Sciences	PM00G18AY0102	F	43	Papillary Thyroid Cancer	2	1	1	0	Both	None			203	None		FFPE
Shanxi Bethune Hospital, Shanxi Academy of Medical Sciences	PM00G18AY0092	M	34	Papillary Thyroid Cancer	2	3	1	0	Both	BRAF exon15:c.T1799A:p.V600E 13.30%	BRAF exon15:c.T1799A:p.V600E	13.30%	206	BRAF	13.30%	FFPE
Shanxi Bethune Hospital, Shanxi Academy of Medical Sciences	PM00G18AY0095	F	52	Papillary Thyroid Cancer	2	1	1	0	Both	BRAF exon15:c.T1799A:p.V600E 18.34%	BRAF exon15:c.T1799A:p.V600E	18.34%	207	BRAF	18.34%	FFPE
Shanxi Bethune Hospital, Shanxi Academy of Medical Sciences	PM00G18AY0097	F	43	Papillary Thyroid Cancer	2	1	1	0	Both	BRAF exon15:c.T1799A:p.V600E 28.57%	BRAF exon15:c.T1799A:p.V600E	28.57%	209	BRAF	28.57%	FFPE
Shanxi Bethune Hospital, Shanxi Academy of Medical Sciences	PM00G18AY0115	M	50	Papillary Thyroid Cancer	2	1	1	0	Both	BRAF exon15:c.T1799A:p.V600E 3.61%	BRAF exon15:c.T1799A:p.V600E 3.61%	3.61%	211	BRAF	3.61%	FFPE
Shanxi Bethune Hospital, Shanxi Academy of Medical Sciences	PM00G18AY0111	F	37	Papillary Thyroid Cancer	2	1	1	0	Both	CCDC6_1:RET_12			215	RET CCDC6		FFPE
Shanxi Bethune Hospital, Shanxi Academy of Medical Sciences	PM00G18AY0107	F	45	Papillary Thyroid Cancer	2	1	1	0	Both	BRAF exon15:c.T1799A:p.V600E 9.18%	BRAF exon15:c.T1799A:p.V600E	9.18%	216	BRAF	9.18%	FFPE
Shanxi Bethune Hospital, Shanxi Academy of Medical Sciences	PM00G18AY0122	F	52	Papillary Thyroid Cancer	2	4	0	0	Both	RET NCOA4_7:RET_12			223	RET NCOA4		FFPE
Shanxi Bethune Hospital, Shanxi Academy of Medical Sciences	PM00G19AY0038	F	53	Papillary Thyroid Cancer	2	1	0	0	Both	BRAF	BRAF exon15:c.T1799A:p.V600E	0.79%	230	BRAF	0.79%	FFPE
Shanxi Bethune Hospital, Shanxi Academy of Medical Sciences	PM00G19AY0034	F	40	Papillary Thyroid Cancer	2	2	0	0	Both	BRAF	BRAF exon15:c.T1799A:p.V600E	4.03%	234	BRAF	4.03%	FFPE
Shanxi Bethune Hospital, Shanxi Academy of Medical Sciences	PM00G19AY0080	F	36	Papillary Thyroid Cancer	2	1	1	0	Both	BRAF	BRAF exon15:c.T1799A:p.V600E	31.48%	237	BRAF	31.48%	FFPE
Shanxi Bethune Hospital, Shanxi Academy of Medical Sciences	PM00G18AY0113	F	42	Papillary Thyroid Cancer	2	1	0	0	Right	BRAF exon15:c.T1799A:p.V600E 9.54%	BRAF exon15:c.T1799A:p.V600E	9.54%	214	BRAF	9.54%	FFPE
Shanxi Bethune Hospital, Shanxi Academy of Medical Sciences	PM00G19AY0000	F	33	Papillary Thyroid Cancer	2	1	1	0	Right	RET NCOA4_8:RET_12			217	RET NCOA4		FFPE
Shanxi Bethune Hospital, Shanxi Academy of Medical Sciences	PM00G19AY0047	F	36	Papillary Thyroid Cancer	2	1	1	0	Right	BRAF	exon15:c.T1799A:p.V600E	16.92%	225	BRAF	16.92%	FFPE
Shanxi Bethune Hospital, Shanxi Academy of Medical Sciences	PM00G19AY0032	F	56	Papillary Thyroid Cancer	2	1	0	0	Right	BRAF	BRAF exon15:c.T1799A:p.V600E	0.52%	233	BRAF	0.52%	FFPE
Shanxi Bethune Hospital, Shanxi Academy of Medical Sciences	PM00G18AY0125	F	34	Papillary Thyroid Cancer	1	3	1	0	Left	BRAF exon15:c.T1799A:p.V600E 41.65%		0.4165	218	BRAF	0.4165	FFPE
Shanxi Bethune Hospital, Shanxi Academy of Medical Sciences	PM00G19AY0031	F	31	Papillary Thyroid Cancer	1	1	1	0	Right	BRAF exon15:c.T1799A:p.V600E		0.2961	221	BRAF	0.2961	FFPE
The First Affiliated Hospital of Qingdao University	PM00G18AN0467	F	42	Papillary Thyroid Cancer	1	x	x	0	Left	BRAF exon15:c.T1799A:p.V600E 1.81%	BRAF exon15:c.T1799A:p.V600E	1.81%	249	BRAF	1.81%	FFPE
The First Affiliated Hospital of Qingdao University	PM00G19AN0071	M	43	Papillary Thyroid Cancer	1	x	x	0	Left	BRAF exon15:c.T1799A:p.V600E 12.42%	BRAF exon15:c.T1799A:p.V600E	12.42%	250	BRAF	0.1242	Fresh
The First Affiliated Hospital of Qingdao University	PM00G18AN0461	F	39	Papillary Thyroid Cancer	1	1	0	0	Left	BRAF exon15:c.T1799A:p.V600E 14.3%;TERT C250T 15.6%	BRAF exon15:c.T1799A:p.V600E;TERT C250T	14.3%;15.6%	251	BRAF	0.143	FFPE
The First Affiliated Hospital of Qingdao University	PM00G18AN0449	F	33	Papillary Thyroid Cancer	1	x	x	0	Left	BRAF exon15:c.T1799A:p.V600E 2.55%	BRAF exon15:c.T1799A:p.V600E	2.55%	254	BRAF	0.0255	Fresh
The First Affiliated Hospital of Qingdao University	PM00G18AN0319	F	69	Papillary Thyroid Cancer	1	1	x	0	Left	BRAF exon15:c.T1799A:p.V600E	BRAF exon15:c.T1799A:p.V600E	0.29%	272	BRAF	0.29%	Fresh
The First Affiliated Hospital of Qingdao University	PM00G18AN0321	F	46	Papillary Thyroid Cancer	1	1	0	0	Left	BRAF exon15:c.T1799A:p.V600E	BRAF exon15:c.T1799A:p.V600E	15.80%	273	BRAF	15.80%	Fresh
The First Affiliated Hospital of Qingdao University	PM00G19AN0209	F	39	Papillary Thyroid Cancer	1	x	x	0	Left	BRAF	BRAF exon15:c.T1799A:p.V600E	0.41%	288	BRAF	0.0041	Fresh
The First Affiliated Hospital of Qingdao University	PM00G19AN0085	F	55	Papillary Thyroid Cancer	1	1	1	0	Left	None	None	None	297	None		Fresh
The First Affiliated Hospital of Qingdao University	PM00G18AN0528	M	48	Papillary Thyroid Cancer	2	x	x	0	Left	BRAF exon15:c.T1799A:p.V600E 0.27%	BRAF exon15:c.T1799A:p.V600E	0.27%	246	BRAF	0.27%	Fresh
The First Affiliated Hospital of Qingdao University	PM00G18AN0456	M	46	Papillary Thyroid Cancer	2	x	x	0	Left	BRAF exon15:c.T1799A:p.V600E 0.34%	BRAF exon15:c.T1799A:p.V600E	0.34%	247	BRAF	0.34%	Fresh
The First Affiliated Hospital of Qingdao University	PM00G18AN0469	F	55	Papillary Thyroid Cancer	2	x	x	0	Left	BRAF exon15:c.T1799A:p.V600E 1.08%	BRAF exon15:c.T1799A:p.V600E	1.08%	248	BRAF	0.0108	Fresh
The First Affiliated Hospital of Qingdao University	PM00G18AN0448	M	36	Papillary Thyroid Cancer	2	1	2	0	Left	BRAF exon15:c.T1799A:p.V600E 18.18%	BRAF exon15:c.T1799A:p.V600E	18.18%	252	BRAF	18.18%	Fresh
The First Affiliated Hospital of Qingdao University	PM00G18AN0464	M	49	Papillary Thyroid Cancer	2	x	x	0	Left	BRAF exon15:c.T1799A:p.V600E 7.42%	BRAF exon15:c.T1799A:p.V600E	7.42%	263	BRAF	7.42%	Fresh
The First Affiliated Hospital of Qingdao University	PM00G19AN0238	F	52	Papillary Thyroid Cancer	2	1	2	0	Left	BRAF	BRAF exon15:c.T1799A:p.V600E	14.82%	268	BRAF	14.82%	Fresh
The First Affiliated Hospital of Qingdao University	PM00G19AN0086	M	62	Papillary Thyroid Cancer	2	x	x	0	Left	BRAF	BRAF exon15:c.T1799A:p.V600E	32.43%	269	BRAF	32.43%	Fresh
The First Affiliated Hospital of Qingdao University	PM00G18AN0318	F	49	Papillary Thyroid Cancer	2	1	0	0	Left	BRAF exon15:c.T1799A:p.V600E	BRAF exon15:c.T1799A:p.V600E	9.86%	271	BRAF	9.86%	Fresh
The First Affiliated Hospital of Qingdao University	PM00G18AN0338	F	30	Papillary Thyroid Cancer	2	x	x	0	Left	BRAF exon15:c.T1799A:p.V600E 5.35%	BRAF exon15:c.T1799A:p.V600E	5.35%	281	BRAF	5.35%	Fresh
The First Affiliated Hospital of Qingdao University	PM00G19AN0236	M	33	Papillary Thyroid Cancer	2	x	x	0	Left	None	None	None	296	None		Fresh
The First Affiliated Hospital of Qingdao University	PM00G18AN0512	F	56	Papillary Thyroid Cancer	2	1	x	0	Left	None	None	None	299	None		Fresh
The First Affiliated Hospital of Qingdao University	PM00G19AN0216	F	56	Papillary Thyroid Cancer	2	1	1	0	Both	BRAF	BRAF exon15:c.T1799A:p.V600E	5.19%	243	BRAF	5.19%	Fresh
The First Affiliated Hospital of Qingdao University	PM00G18AN0527	F	56	Papillary Thyroid Cancer	2	1	0	0	Both	BRAF exon15:c.T1799A:p.V600E 0.49%	BRAF exon15:c.T1799A:p.V600E	0.49%	244	BRAF	0.49%	Fresh
The First Affiliated Hospital of Qingdao University	PM00G18AN0525	F	56	Papillary Thyroid Cancer	2	1	1	0	Both	BRAF exon15:c.T1799A:p.V600E 6.88%	BRAF exon15:c.T1799A:p.V600E	6.88%	245	BRAF	6.88%	Fresh
The First Affiliated Hospital of Qingdao University	PM00G19AN0083	F	58	Papillary Thyroid Cancer	2	1	1	0	Both	BRAF	BRAF exon15:c.T1799A:p.V600E	10.79%	270	BRAF	10.79%	FFPE
The First Affiliated Hospital of Qingdao University	PM00G18AN0322	M	60	Papillary Thyroid Cancer	2	1	0	0	Both	BRAF exon15:c.T1799A:p.V600E	BRAF exon15:c.T1799A:p.V600E	9.61%	274	BRAF	9.61%	Fresh
The First Affiliated Hospital of Qingdao University	PM00G18AN0516	F	59	Papillary Thyroid Cancer	2	2	2	0	Both	None			298	None		Fresh
The First Affiliated Hospital of Qingdao University	PM00G19AN0222	F	33	Papillary Thyroid Cancer	2	3	1	0	Both	BRAF	exon15:c.T1799A:p.V600E	12.42%	301	BRAF	12.42%	Fresh
The First Affiliated Hospital of Qingdao University	PM00G19AN0210	F	70	Papillary Thyroid Cancer	2	1	1	0	Right	BRAF	BRAF exon15:c.T1799A:p.V600E	0.93%	253	BRAF	0.93%	Fresh
The First Affiliated Hospital of Qingdao University	PM00G18AN0446	F	28	Papillary Thyroid Cancer	2	1	2	0	Right	BRAF exon15:c.T1799A:p.V600E 10.56%	BRAF exon15:c.T1799A:p.V600E	10.56%	256	BRAF	10.56%	Fresh
The First Affiliated Hospital of Qingdao University	PM00G18AN0470	F	58	Papillary Thyroid Cancer	2	1	0	0	Right	BRAF exon15:c.T1799A:p.V600E 15.3%	BRAF exon15:c.T1799A:p.V600E	15.3%	258	BRAF	0.153	Fresh
The First Affiliated Hospital of Qingdao University	PM00G19AN0069	F	49	Papillary Thyroid Cancer	2	1	2	0	Right	BRAF exon15:c.T1799A:p.V600E 2.41%	BRAF exon15:c.T1799A:p.V600E	2.41%	259	BRAF	2.41%	Fresh
The First Affiliated Hospital of Qingdao University	PM00G18AN0529	F	31	Papillary Thyroid Cancer	2	x	x	0	Right	BRAF exon15:c.T1799A:p.V600E 23.6%	BRAF exon15:c.T1799A:p.V600E	23.6%	260	BRAF	0.236	Fresh
The First Affiliated Hospital of Qingdao University	PM00G18AN0462	M	42	Papillary Thyroid Cancer	2	x	x	0	Right	BRAF exon15:c.T1799A:p.V600E 26.24%	BRAF exon15:c.T1799A:p.V600E	26.24%	261	BRAF	26.24%	Fresh
The First Affiliated Hospital of Qingdao University	PM00G19AN0072	M	51	Papillary Thyroid Cancer	2	x	x	0	Right	BRAF exon15:c.T1799A:p.V600E 8.43%	BRAF exon15:c.T1799A:p.V600E	8.43%	267	BRAF	8.43%	Fresh
The First Affiliated Hospital of Qingdao University	PM00G19AN0207	F	66	Papillary Thyroid Cancer	2	x	x	0	Right	BRAF	BRAF exon15:c.T1799A:p.V600E	16.72%	276	BRAF	16.72%	Fresh
The First Affiliated Hospital of Qingdao University	PM00G19AN0215	F	64	Papillary Thyroid Cancer	2	x	x	0	Right	BRAF	BRAF exon15:c.T1799A:p.V600E	35.20%	277	BRAF	35.20%	Fresh
The First Affiliated Hospital of Qingdao University	PM00G18AN0337	F	41	Papillary Thyroid Cancer	2	x	x	0	Right	BRAF exon15:c.T1799A:p.V600E 1.80%	BRAF exon15:c.T1799A:p.V600E	1.80%	278	BRAF	1.80%	Fresh
The First Affiliated Hospital of Qingdao University	PM00G18AN0320	F	43	Papillary Thyroid Cancer	2	x	x	0	Right	BRAF exon15:c.T1799A:p.V600E	BRAF exon15:c.T1799A:p.V600E	9.98%	279	BRAF	9.98%	Fresh
The First Affiliated Hospital of Qingdao University	PM00G18AN0340	F	37	Papillary Thyroid Cancer	2	1	2	0	Right	BRAF exon15:c.T1799A:p.V600E 1.39%	BRAF exon15:c.T1799A:p.V600E	1.39%	280	BRAF	1.39%	Fresh
The First Affiliated Hospital of Qingdao University	PM00G18AN0335	M	23	Papillary Thyroid Cancer	2	x	x	0	Right	BRAF exon15:c.T1799A:p.V600E 22.85%	BRAF exon15:c.T1799A:p.V600E 22.85%	22.85%	282	BRAF	22.85%	Fresh
The First Affiliated Hospital of Qingdao University	PM00G18AN0314	F	53	Papillary Thyroid Cancer	2	3	2	0	Right	BRAF exon15:c.T1799A:p.V600E 7.84%	BRAF exon15:c.T1799A:p.V600E	7.84%	283	BRAF	7.84%	Fresh
The First Affiliated Hospital of Qingdao University	PM00G19AN0221	M	25	Papillary Thyroid Cancer	2	x	2	0	Right	RET CCDC6_1:RET_12	None		287	RET CCDC6		Fresh
The First Affiliated Hospital of Qingdao University	PM00G19AN0214	F	50	Papillary Thyroid Cancer	2	1	x	0	Right	None	None	None	289	None		Fresh
The First Affiliated Hospital of Qingdao University	PM00G19AN0089	F	62	Papillary Thyroid Cancer	2	1	1	0	Right	None	None	None	290	None		Fresh
The First Affiliated Hospital of Qingdao University	PM00G19AN0078	F	17	Papillary Thyroid Cancer	2	x	x	0	Right	None	None	None	291	None		Fresh
The First Affiliated Hospital of Qingdao University	PM00G19AN0070	F	40	Papillary Thyroid Cancer	2	1	0	0	Right	None	None	None	292	None		Fresh
The First Affiliated Hospital of Qingdao University	PM00G18AN0447	F	52	Papillary Thyroid Cancer	2	x	1	0	Right	None	None	None	294	None		Fresh
Dalian Municipal Friendship Hospital of Dalian Medical University	PM00G19AS0186	F	68	Papillary Thyroid Cancer	1	1	0	0	Right	BRAF exon15:c.T1799A:p.V600E 25.19%	BRAF exon15:c.T1799A:p.V600E 25.19%	25.19%	302	BRAF	25.19%	Fresh
The First Affiliated Hospital of Dalian Medical University	PM00G18AS0384	M	28	Papillary Thyroid Cancer	1	x	0	0	Right	BRAF	V600E	0.0112	305	BRAF	0.0112	Fresh
The First Affiliated Hospital of Dalian Medical University	PM00G18AS0380	M	40	Papillary Thyroid Cancer	1	x	0	0	Right	BRAF	V600E	0.1081	306	BRAF	0.1081	Fresh
The First Affiliated Hospital of Dalian Medical University	PM00G18AS0379	F	41	Papillary Thyroid Cancer	1	x	0	0	Right	BRAF	V600E	0.1081	307	BRAF	0.1081	Fresh
The First Affiliated Hospital of Dalian Medical University	PM00G18AS0263	F	23	Papillary Thyroid Cancer	1	x	0	0	Right	BRAF	V600E	0.3321	310	BRAF	0.3321	Fresh
The First Affiliated Hospital of Dalian Medical University	PM00G18AS1021	F	29	Papillary Thyroid Cancer	1	x	1	0	Right	BRAF exon15:c.T1799A:p.V600E			314	BRAF		Fresh
The First Affiliated Hospital of Dalian Medical University	PM00G18AS1007	F	58	Papillary Thyroid Cancer	1	x	0	0	Right	BRAF exon15:c.T1799A:p.V600E		0.0154	316	BRAF	0.0154	Fresh
The First Affiliated Hospital of Dalian Medical University	PM00G18AS0978	F	54	Papillary Thyroid Cancer	1	x	0	0	Right	BRAF exon15:c.T1799A:p.V600E	exon15:c.T1799A:p.V600E		318	BRAF		Fresh
The First Affiliated Hospital of Dalian Medical University	PM00G18AS0935	M	34	Papillary Thyroid Cancer	1	x	1	0	Right	BRAF	exon15:c.T1799A:p.V600E	0.0044	324	BRAF	0.0044	Fresh
The First Affiliated Hospital of Dalian Medical University	PM00G18AS0934	M	38	Papillary Thyroid Cancer	1	x	0	0	Right	BRAF	exon15:c.T1799A:p.V600E		325	BRAF		Fresh
The First Affiliated Hospital of Dalian Medical University	PM00G18AS0931	F	55	Papillary Thyroid Cancer	1	x	1	0	Right	BRAF	exon15:c.T1799A:p.V600E	0.0191	327	BRAF	0.0191	Fresh
The First Affiliated Hospital of Dalian Medical University	PM00G18AS0908	F	58	Papillary Thyroid Cancer	1	1	0	0	Right	BRAF	exon15:c.T1799A:p.V600E	0.1427	333	BRAF	0.1427	Fresh
The First Affiliated Hospital of Dalian Medical University	PM00G18AS0910	F	36	Papillary Thyroid Cancer	1	1	1	0	Right	BRAF	exon15:c.T1799A:p.V600E	0.0922	334	BRAF	0.0922	FFPE
The First Affiliated Hospital of Dalian Medical University	PM00G18AS0902	F	49	Papillary Thyroid Cancer	1	1	0	0	Right	BRAF	exon15:c.T1799A:p.V600E	0.0533	335	BRAF	0.0533	Fresh
The First Affiliated Hospital of Dalian Medical University	PM00G18AS0892	M	49	Papillary Thyroid Cancer	1	3	2	0	Right	BRAF	exon15:c.T1799A:p.V600E	0.0838	337	BRAF	0.0838	FFPE
The First Affiliated Hospital of Dalian Medical University	PM00G18AS0881	F	59	Papillary Thyroid Cancer	1	x	0	0	Right	BRAF exon15:c.T1799A:p.V600E 2.30%	BRAF exon15:c.T1799A:p.V600E	2.30%	338	BRAF	2.30%	Fresh
The First Affiliated Hospital of Dalian Medical University	PM00G18AS0846	F	50	Papillary Thyroid Cancer	1	x	0	0	Right	BRAF exon15:c.T1799A:p.V600E 10.19%	BRAF exon15:c.T1799A:p.V600E	10.19%	345	BRAF	10.19%	Fresh
The First Affiliated Hospital of Dalian Medical University	PM00G18AS0836	F	30	Papillary Thyroid Cancer	1	x	1	0	Right	RET NCOA4_8:RET_12			347	RET NCOA4		Fresh
The First Affiliated Hospital of Dalian Medical University	PM00G18AS1117	F	71	Papillary Thyroid Cancer	1	x	1	0	Right	BRAF exon15:c.T1799A:p.V600E 0.62%	BRAF exon15:c.T1799A:p.V600E	0.62%	350	BRAF	0.62%	FFPE
The First Affiliated Hospital of Dalian Medical University	PM00G18AS1081	F	54	Papillary Thyroid Cancer	1	1	0	0	Right	BRAF exon15:c.T1799A:p.V600E 0.22%	BRAF exon15:c.T1799A:p.V600E 0.22%	0.22%	354	BRAF	0.22%	Fresh
The First Affiliated Hospital of Dalian Medical University	PM00G18AS1087	F	30	Papillary Thyroid Cancer	1	x	1	0	Right	None	None	None	355	None		Fresh
The First Affiliated Hospital of Dalian Medical University	PM00G18AS1097	M	35	Papillary Thyroid Cancer	1	x	x	0	Right	None	None	None	356	None		Fresh
The First Affiliated Hospital of Dalian Medical University	PM00G18AS1460	F	45	Papillary Thyroid Cancer	1	x	0	0	Right	BRAF exon15:c.T1799A:p.V600E 2.55%	BRAF exon15:c.T1799A:p.V600E 2.55%	2.55%	361	BRAF	2.55%	Fresh
The First Affiliated Hospital of Dalian Medical University	PM00G18AS1460	F	45	Papillary Thyroid Cancer	1	x	0	0	Right	BRAF exon15:c.T1799A:p.V600E 2.55%	BRAF exon15:c.T1799A:p.V600E 2.55%	2.55%	361	BRAF	0.0255	Fresh
The First Affiliated Hospital of Dalian Medical University	PM00G18AS1424	F	47	Papillary Thyroid Cancer	1	1	0	0	Right	None	None	None	364	None		Fresh
The First Affiliated Hospital of Dalian Medical University	PM00G18AS1413	F	46	Papillary Thyroid Cancer	1	1	0	0	Right	BRAF exon15:c.T1799A:p.V600E 3.82%	BRAF exon15:c.T1799A:p.V600E	3.82%	367	BRAF	3.82%	Fresh
The First Affiliated Hospital of Dalian Medical University	PM00G19AS0190	F	47	Papillary Thyroid Cancer	1	1	0	0	Right	BRAF exon15:c.T1799A:p.V600E 13.18%	BRAF exon15:c.T1799A:p.V600E	13.18%	371	BRAF	0.1318	Fresh
The First Affiliated Hospital of Dalian Medical University	PM00G19AS0180	F	37	Papillary Thyroid Cancer	1	x	1	0	Right	BRAF exon15:c.T1799A:p.V600E 16.75%	BRAF exon15:c.T1799A:p.V600E 16.75%	16.75%	373	BRAF	16.75%	Fresh
The First Affiliated Hospital of Dalian Medical University	PM00G19AS0161	F	56	Papillary Thyroid Cancer	1	x	0	0	Right	BRAF exon15:c.T1799A:p.V600E 5.71%	BRAF exon15:c.T1799A:p.V600E 5.71%	5.71%	375	BRAF	5.71%	Fresh
The First Affiliated Hospital of Dalian Medical University	PM00G19AS0145	F	56	Papillary Thyroid Cancer	1	1	1	0	Right	BRAF exon15:c.T1799A:p.V600E 2.89%	BRAF exon15:c.T1799A:p.V600E	2.89%	378	BRAF	2.89%	Fresh
The First Affiliated Hospital of Dalian Medical University	PM00G19AS0122	F	37	Papillary Thyroid Cancer	1	1	1	0	Right	None	None	None	382	None		Fresh
The First Affiliated Hospital of Dalian Medical University	PM00G19AS0123	F	57	Papillary Thyroid Cancer	1	x	2	0	Right	BRAF exon15:c.T1799A:p.V600E 29.14%	BRAF exon15:c.T1799A:p.V600E 29.14%	29.14%	383	BRAF	29.14%	Fresh
The First Affiliated Hospital of Dalian Medical University	PM00G19AS0037	M	37	Papillary Thyroid Cancer	1	1	2	0	Right	BRAF	exon15:c.T1799A:p.V600E	5.85%	400	BRAF	5.85%	Fresh
The First Affiliated Hospital of Dalian Medical University	PM00G19AS0033	M	40	Papillary Thyroid Cancer	1	1	1	0	Right	BRAF	V600E		401	BRAF		Fresh
The First Affiliated Hospital of Dalian Medical University	PM00G19AS0664	F	44	Papillary Thyroid Cancer	1	1	2	0	Right	RET CCDC6_1:RET_12	None	None	411	RET CCDC6		Fresh
The First Affiliated Hospital of Dalian Medical University	PM00G19AS0642	F	56	Papillary Thyroid Cancer	1	1	0	0	Right	None	None	None	414	None		Fresh
The First Affiliated Hospital of Dalian Medical University	PM00G19AS0624	F	51	Papillary Thyroid Cancer	1	1	0	0	Right	BRAF	exon15:c.T1799A:p.V600E	38.34%	418	BRAF	38.34%	Fresh
The First Affiliated Hospital of Dalian Medical University	PM00G19AS0376	F	62	Papillary Thyroid Cancer	1	1	1	0	Right	BRAF	exon15:c.T1799A:p.V600E	16.52%	420	BRAF	16.52%	Fresh
The First Affiliated Hospital of Dalian Medical University	PM00G19AS0377	F	59	Papillary Thyroid Cancer	1	1	0	0	Right	BRAF	exon15:c.T1799A:p.V600E	0.64%	423	BRAF	0.64%	Fresh
The First Affiliated Hospital of Dalian Medical University	PM00G19AS0378	F	60	Papillary Thyroid Cancer	1	1	0	0	Right	None	None	None	424	None		FFPE
The First Affiliated Hospital of Dalian Medical University	PM00G19AS0364	F	52	Papillary Thyroid Cancer	1	1	0	0	Right	BRAF	exon15:c.T1799A:p.V600E	2.30%	433	BRAF	2.30%	Fresh
The First Affiliated Hospital of Dalian Medical University	PM00G19AS0354	F	66	Papillary Thyroid Cancer	1	x	1	0	Right	BRAF	BRAF exon15:c.T1799A:p.V600E	5.22%	434	BRAF	5.22%	Fresh
The First Affiliated Hospital of Dalian Medical University	PM00G18AS1465	F	55	Papillary Thyroid Cancer	1	x	0	0	Both	None	None	None	359	None		Fresh
The First Affiliated Hospital of Dalian Medical University	PM00G18AS0151	F	24	Papillary Thyroid Cancer	1	x	0	0	Left	None		#N/A	303	None		FFPE
The First Affiliated Hospital of Dalian Medical University	PM00G18AS0662	F	28	Papillary Thyroid Cancer	1	x	1	0	Left	BRAF	V600E	0.0091	312	BRAF	0.0091	FFPE
The First Affiliated Hospital of Dalian Medical University	PM00G18AS1018	F	52	Papillary Thyroid Cancer	1	x	0	0	Left	None			315	None		FFPE
The First Affiliated Hospital of Dalian Medical University	PM00G18AS0992	F	41	Papillary Thyroid Cancer	1	3	1	0	Left	BRAF	exon15:c.T1799A:p.V600E	0.1433	317	BRAF	0.1433	FFPE
The First Affiliated Hospital of Dalian Medical University	PM00G18AS0923	F	44	Papillary Thyroid Cancer	1	x	1	0	Left	BRAF	exon15:c.T1799A:p.V600E	0.335	328	BRAF	0.335	FFPE
The First Affiliated Hospital of Dalian Medical University	PM00G18AS0922	M	37	Papillary Thyroid Cancer	1	x	1	0	Left	BRAF	exon15:c.T1799A:p.V600E	0.1753	329	BRAF	0.1753	FFPE
The First Affiliated Hospital of Dalian Medical University	PM00G19AS0118	F	46	Papillary Thyroid Cancer	1	1	0	0	Both	None	None	None	385	None		FFPE
The First Affiliated Hospital of Dalian Medical University	PM00G18AS0859	M	58	Papillary Thyroid Cancer	1	x	1	0	Left	BRAF c.T1799A:p.V600E，TERT C228T	BRAF c.T1799A:p.V600E，TERT C228T	41.78%，36.81%	339	BRAF TERT	0.4178	FFPE
The First Affiliated Hospital of Dalian Medical University	PM00G18AS0875	F	27	Papillary Thyroid Cancer	1	x	1	0	Left	None	None	None	341	None		FFPE
The First Affiliated Hospital of Dalian Medical University	PM00G18AS0867	M	48	Papillary Thyroid Cancer	1	x	1	0	Left	BRAF exon15:c.T1799A:p.V600E	BRAF exon15:c.T1799A:p.V600E	1.12%	343	BRAF	1.12%	FFPE
The First Affiliated Hospital of Dalian Medical University	PM00G18AS0869	F	41	Papillary Thyroid Cancer	1	x	1	0	Left	None	None	None	344	None		FFPE
The First Affiliated Hospital of Dalian Medical University	PM00G18AS0823	M	25	Papillary Thyroid Cancer	1	x	1	0	Left	BRAF exon15:c.T1799A:p.V600E 13.92%	BRAF exon15:c.T1799A:p.V600E	13.92%	349	BRAF	13.92%	FFPE
The First Affiliated Hospital of Dalian Medical University	PM00G18AS1077	F	65	Papillary Thyroid Cancer	1	x	0	0	Left	BRAF exon15:c.T1799A:p.V600E 2.23%	BRAF exon15:c.T1799A:p.V600E 2.23%	2.23%	357	BRAF	2.23%	Fresh
The First Affiliated Hospital of Dalian Medical University	PM00G18AS1432	F	24	Papillary Thyroid Cancer	1	1	1	0	Left	BRAF exon15:c.T1799A:p.V600E 24.84%	BRAF exon15:c.T1799A:p.V600E 24.84%	24.84%	363	BRAF	24.84%	Fresh
The First Affiliated Hospital of Dalian Medical University	PM00G18AS1420	F	34	Papillary Thyroid Cancer	1	x	1	0	Left	BRAF exon15:c.T1799A:p.V600E 3.14%	BRAF exon15:c.T1799A:p.V600E 3.14%	3.14%	366	BRAF	3.14%	FFPE
The First Affiliated Hospital of Dalian Medical University	PM00G19AS0119	F	29	Papillary Thyroid Cancer	1	1	1	0	Left	None	None	None	384	None		FFPE
The First Affiliated Hospital of Dalian Medical University	PM00G19AS0112	F	33	Papillary Thyroid Cancer	1	1	0	0	Left	BRAF exon15:c.T1799A:p.V600E 18.21%	BRAF exon15:c.T1799A:p.V600E 18.21%	18.21%	386	BRAF	18.21%	FFPE
The First Affiliated Hospital of Dalian Medical University	PM00G19AS0098	M	55	Papillary Thyroid Cancer	1	1	0	0	Left	KRAS;BRAF	c.G35T:p.G12V; c.T1799A:p.V600E	1.32%; 20.62%	387	BRAF KRAS	0.2062	FFPE
The First Affiliated Hospital of Dalian Medical University	PM00G19AS0064	F	23	Papillary Thyroid Cancer	1	1	1	0	Left	BRAF	exon15:c.T1799A:p.V600E	1.72%	394	BRAF	1.72%	FFPE
The First Affiliated Hospital of Dalian Medical University	PM00G19AS0683	F	56	Papillary Thyroid Cancer	1	2	0	0	Left	BRAF	exon15:c.T1799A:p.V600E	0.2%	410	BRAF	0.2%	FFPE
The First Affiliated Hospital of Dalian Medical University	PM00G19AS0387	F	47	Papillary Thyroid Cancer	1	1	0	0	Both	BRAF	BRAF exon15:c.T1799A:p.V600E	10.64%	428	BRAF	10.64%	FFPE
The First Affiliated Hospital of Dalian Medical University	PM00G19AS0631	M	40	Papillary Thyroid Cancer	1	1	0	0	Left	None	None	None	417	None		FFPE
The First Affiliated Hospital of Dalian Medical University	PM00G19AS0389	M	28	Papillary Thyroid Cancer	1	1	0	0	Left	BRAF	exon15:c.T1799A:p.V600E	7.58%	425	BRAF	7.58%	FFPE
The First Affiliated Hospital of Dalian Medical University	PM00G19AS0370	F	37	Papillary Thyroid Cancer	1	1	0	0	Left	None			426	None		FFPE
The First Affiliated Hospital of Dalian Medical University	PM00G19AS0363	F	33	Papillary Thyroid Cancer	1	1	0	0	Left	BRAF	exon15:c.T1799A:p.V600E	3.77%	431	BRAF	3.77%	Fresh
The First Affiliated Hospital of Dalian Medical University	PM00G19AS0355	F	68	Papillary Thyroid Cancer	1	x	0	0	Left	None	None	None	435	None		Fresh
The First Affiliated Hospital of Dalian Medical University	PM00G18AS0244	F	41	Papillary Thyroid Cancer	2	x	1	0	Left	BRAF	V600E	0.1274	311	BRAF	0.1274	Fresh
The First Affiliated Hospital of Dalian Medical University	PM00G18AS0897	F	34	Papillary Thyroid Cancer	2	x	1	0	Left	BRAF	exon15:c.T1799A:p.V600E	0.1992	336	BRAF	0.1992	Fresh
The First Affiliated Hospital of Dalian Medical University	PM00G18AS1419	F	53	Papillary Thyroid Cancer	2	2	0	0	Left	BRAF exon15:c.T1799A:p.V600E 14.29%	BRAF exon15:c.T1799A:p.V600E 14.29%	14.29%	365	BRAF	14.29%	Fresh
The First Affiliated Hospital of Dalian Medical University	PM00G19AS0197	M	45	Papillary Thyroid Cancer	2	1	1	0	Left	BRAF exon15:c.T1799A:p.V600E 8.06%	BRAF exon15:c.T1799A:p.V600E	8.06%	369	BRAF	8.06%	Fresh
The First Affiliated Hospital of Dalian Medical University	PM00G19AS0158	M	48	Papillary Thyroid Cancer	2	1	1	0	Left	BRAF exon15:c.T1799A:p.V600E 0.5%	BRAF exon15:c.T1799A:p.V600E 0.5%	0.5%	376	BRAF	0.5%	FFPE
The First Affiliated Hospital of Dalian Medical University	PM00G19AS0155	F	52	Papillary Thyroid Cancer	2	1	0	0	Left	BRAF	exon15:c.T1799A:p.V600E	0.2501	379	BRAF	0.2501	Fresh
The First Affiliated Hospital of Dalian Medical University	PM00G19AS0154	F	66	Papillary Thyroid Cancer	2	1	0	0	Left	None			381	None		Fresh
The First Affiliated Hospital of Dalian Medical University	PM00G19AS0088	F	37	Papillary Thyroid Cancer	2	x	0	0	Left	NCOA4_8:RET_12	None	None	389	RET NCOA4		Fresh
The First Affiliated Hospital of Dalian Medical University	PM00G19AS0089	M	68	Papillary Thyroid Cancer	2	x	1	0	Left	None	None	None	390	None		Fresh
The First Affiliated Hospital of Dalian Medical University	PM00G19AS0082	F	65	Papillary Thyroid Cancer	2	x	1	0	Left	None	None	None	391	None		Fresh
The First Affiliated Hospital of Dalian Medical University	PM00G19AS0042	F	57	Papillary Thyroid Cancer	2	1	0	0	Left	BRAF	exon15:c.T1799A:p.V600E	7.08%	398	BRAF	7.08%	Fresh
The First Affiliated Hospital of Dalian Medical University	PM00G19AS0006	F	44	Papillary Thyroid Cancer	2	1	0	0	Left	BRAF	exon15:c.T1799A:p.V600E	0.475%	404	BRAF	0.475%	Fresh
The First Affiliated Hospital of Dalian Medical University	PM00G19AS0649	F	58	Papillary Thyroid Cancer	2	1	0	0	Left	BRAF	exon15:c.T1799A:p.V600E	0.68%	413	BRAF	0.68%	FFPE
The First Affiliated Hospital of Dalian Medical University	PM00G19AS0383	F	35	Papillary Thyroid Cancer	2	1	0	0	Left	None			430	None		Fresh
The First Affiliated Hospital of Dalian Medical University	PM00G19AS0365	F	36	Papillary Thyroid Cancer	2	x	x	0	Left	BRAF	exon15:c.T1799A:p.V600E	16.66%	432	BRAF	16.66%	Fresh
The First Affiliated Hospital of Dalian Medical University	PM00G18AS0330	F	44	Papillary Thyroid Cancer	2	x	0	0	Both	BRAF	V600E	0.0118	308	BRAF	0.0118	Fresh
The First Affiliated Hospital of Dalian Medical University	PM00G18AS0974	F	34	Papillary Thyroid Cancer	2	x	0	0	Both	BRAF exon15:c.T1799A:p.V600E	exon15:c.T1799A:p.V600E		319	BRAF		Fresh
The First Affiliated Hospital of Dalian Medical University	PM00G18AS0962	F	56	Papillary Thyroid Cancer	2	x	0	0	Both	BRAF exon15:c.T1799A:p.V600E	exon15:c.T1799A:p.V600E		320	BRAF		Fresh
The First Affiliated Hospital of Dalian Medical University	PM00G18AS0976	M	39	Papillary Thyroid Cancer	2	x	1	0	Both	BRAF	exon15:c.T1799A:p.V600E	0.1735	321	BRAF	0.1735	Fresh
The First Affiliated Hospital of Dalian Medical University	PM00G18AS0936	M	48	Papillary Thyroid Cancer	2	x	1	0	Both	BRAF	exon15:c.T1799A:p.V600E	0.0499	323	BRAF	0.0499	Fresh
The First Affiliated Hospital of Dalian Medical University	PM00G18AS0932	F	47	Papillary Thyroid Cancer	2	x	0	0	Both	None			326	None		Fresh
The First Affiliated Hospital of Dalian Medical University	PM00G18AS0917	F	45	Papillary Thyroid Cancer	2	x	1	0	Both	BRAF	exon15:c.T1799A:p.V600E	0.0208	330	BRAF	0.0208	FFPE
The First Affiliated Hospital of Dalian Medical University	PM00G18AS0915	F	39	Papillary Thyroid Cancer	2	1	1	0	Both	None			331	None		FFPE
The First Affiliated Hospital of Dalian Medical University	PM00G18AS0876	F	61	Papillary Thyroid Cancer	2	x	0	0	Both	BRAF exon15:c.T1799A:p.V600E	BRAF exon15:c.T1799A:p.V600E	22.06%	340	BRAF	22.06%	Fresh
The First Affiliated Hospital of Dalian Medical University	PM00G18AS0831	F	54	Papillary Thyroid Cancer	2	x	1	0	Both	EGFR exon21:c.T2573G:p.L858R 0.57%	EGFR exon21:c.T2573G:p.L858R	0.57%	346	EGFR		Fresh
The First Affiliated Hospital of Dalian Medical University	PM00G18AS1101	F	60	Papillary Thyroid Cancer	2	x	1	0	Both	BRAF exon15:c.T1799A:p.V600E 0.38%	BRAF exon15:c.T1799A:p.V600E	0.38%	352	BRAF	0.38%	Fresh
The First Affiliated Hospital of Dalian Medical University	PM00G18AS1102	F	57	Papillary Thyroid Cancer	2	x	1	0	Both	BRAF exon15:c.T1799A:p.V600E 0.94%	BRAF exon15:c.T1799A:p.V600E	0.94%	353	BRAF	0.94%	Fresh
The First Affiliated Hospital of Dalian Medical University	PM00G18AS1078	M	62	Papillary Thyroid Cancer	2	x	1	0	Both	None	None	None	358	None		Fresh
The First Affiliated Hospital of Dalian Medical University	PM00G18AS1459	F	41	Papillary Thyroid Cancer	2	x	1	0	Both	BRAF exon15:c.T1799A:p.V600E 1.07%	BRAF exon15:c.T1799A:p.V600E 1.07%	1.07%	360	BRAF	1.07%	Fresh
The First Affiliated Hospital of Dalian Medical University	PM00G18AS1433	M	45	Papillary Thyroid Cancer	2	1	1	0	Both	KRAS exon2:c.G35T:p.G12D 0.30%	KRAS exon2:c.G35T:p.G12D	0.30%	370	KRAS		Fresh
The First Affiliated Hospital of Dalian Medical University	PM00G19AS0176	M	27	Papillary Thyroid Cancer	2	1	1	0	Both	BRAF exon15:c.T1799A:p.V600E 6.81%	BRAF exon15:c.T1799A:p.V600E 6.81%	6.81%	374	BRAF	6.81%	Fresh
The First Affiliated Hospital of Dalian Medical University	PM00G19AS0146	F	47	Papillary Thyroid Cancer	2	1	0	0	Both	BRAF exon15:c.T1799A:p.V600E 5.79%	BRAF exon15:c.T1799A:p.V600E	5.79%	377	BRAF	5.79%	Fresh
The First Affiliated Hospital of Dalian Medical University	PM00G19AS0070	F	52	Papillary Thyroid Cancer	2	2	2	0	Both	BRAF ；TERT	exon15:c.T1799A:p.V600E； C228T	30.20%； 22.38%	392	BRAF TERT	0.302	Fresh
The First Affiliated Hospital of Dalian Medical University	PM00G19AS0069	F	62	Papillary Thyroid Cancer	2	1	1	0	Both	BRAF	exon15:c.T1799A:p.V600E	3.50%	393	BRAF	3.50%	Fresh
The First Affiliated Hospital of Dalian Medical University	PM00G19AS0051	F	60	Papillary Thyroid Cancer	2	1	0	0	Both	BRAF	exon15:c.T1799A:p.V600E	1.96%	395	BRAF	1.96%	Fresh
The First Affiliated Hospital of Dalian Medical University	PM00G19AS0058	F	42	Papillary Thyroid Cancer	2	x	1	0	Both	None	None	None	396	None		Fresh
The First Affiliated Hospital of Dalian Medical University	PM00G19AS0055	F	51	Papillary Thyroid Cancer	2	1	1	0	Both	None	None	None	397	None		FFPE
The First Affiliated Hospital of Dalian Medical University	PM00G19AS0691	M	50	Papillary Thyroid Cancer	2	1	0	0	Both	BRAF	exon15:c.T1799A:p.V600E	0.7%	406	BRAF	0.7%	Fresh
The First Affiliated Hospital of Dalian Medical University	PM00G19AS0693	F	51	Papillary Thyroid Cancer	2	1	0	0	Both	None	None	None	407	None		Fresh
The First Affiliated Hospital of Dalian Medical University	PM00G19AS0684	F	62	Papillary Thyroid Cancer	2	1	2	0	Both	BRAF	exon15:c.T1799A:p.V600E	5.6%	408	BRAF	5.6%	Fresh
The First Affiliated Hospital of Dalian Medical University	PM00G19AS0687	F	50	Papillary Thyroid Cancer	2	1	1	0	Both	None	None	None	409	None		Fresh
The First Affiliated Hospital of Dalian Medical University	PM00G18AS0332	M	53	Papillary Thyroid Cancer	2	x	1	0	Right	BRAF	V600E	0.0436	309	BRAF	0.0436	Fresh
The First Affiliated Hospital of Dalian Medical University	PM00G18AS0664	F	25	Papillary Thyroid Cancer	2	x	1	0	Right	BRAF	V600E	0.0122	313	BRAF	0.0122	Fresh
The First Affiliated Hospital of Dalian Medical University	PM00G18AS0959	M	55	Papillary Thyroid Cancer	2	x	0	0	Right	BRAF	exon15:c.T1799A:p.V600E	0.0251	322	BRAF	0.0251	Fresh
The First Affiliated Hospital of Dalian Medical University	PM00G19AS0634	F	39	Papillary Thyroid Cancer	2	1	1	0	Both	BRAF	exon15:c.T1799A:p.V600E	3.02%	416	BRAF	3.02%	Fresh
The First Affiliated Hospital of Dalian Medical University	PM00G18AS0909	F	28	Papillary Thyroid Cancer	2	x	2	0	Right	BRAF	exon15:c.T1799A:p.V600E	0.2529	332	BRAF	0.2529	Fresh
The First Affiliated Hospital of Dalian Medical University	PM00G19AS0617	F	56	Papillary Thyroid Cancer	2	1	1	0	Both	BRAF	exon15:c.T1799A:p.V600E	10.77%	419	BRAF	10.77%	Fresh
The First Affiliated Hospital of Dalian Medical University	PM00G18AS1112	F	39	Papillary Thyroid Cancer	2	x	2	0	Right	None			351	None		Fresh
The First Affiliated Hospital of Dalian Medical University	PM00G19AS0616	F	21	Papillary Thyroid Cancer	2	3	1	0	Both	BRAF	exon15:c.T1799A:p.V600E	24.01%	421	BRAF	24.01%	Fresh
The First Affiliated Hospital of Dalian Medical University	PM00G19AS0178	F	63	Papillary Thyroid Cancer	2	1	1	0	Right	BRAF exon15:c.T1799A:p.V600E 0.40%	BRAF exon15:c.T1799A:p.V600E 0.40%	0.40%	372	BRAF	0.40%	Fresh
The First Affiliated Hospital of Dalian Medical University	PM00G19AS0302	F	40	Papillary Thyroid Cancer	2	1	0	0	Right	BRAF	exon15:c.T1799A:p.V600E	6.14%	399	BRAF	6.14%	Fresh
The First Affiliated Hospital of Dalian Medical University	PM00G19AS0368	F	63	Papillary Thyroid Cancer	2	1	1	0	Both	BRAF	exon15:c.T1799A:p.V600E	0.87%	427	BRAF	0.87%	Fresh
The First Affiliated Hospital of Dalian Medical University	PM00G19AS0367	F	48	Papillary Thyroid Cancer	2	1	1	0	Both	BRAF	exon15:c.T1799A:p.V600E	12.23%	429	BRAF	12.23%	Fresh
The First Affiliated Hospital of Dalian Medical University	PM00G19AS0017	F	46	Papillary Thyroid Cancer	2	1	1	0	Right	BRAF	exon15:c.T1799A:p.V600E	19.78%	403	BRAF	19.78%	FFPE
The First Affiliated Hospital of Dalian Medical University	PM00G19AS0015	F	61	Papillary Thyroid Cancer	2	1	0	0	Right	BRAF	exon15:c.T1799A:p.V600E	3.9%	405	BRAF	3.9%	Fresh
The First Affiliated Hospital of Dalian Medical University	PM00G19AS0658	F	46	Papillary Thyroid Cancer	2	1	0	0	Right	None	None	None	412	None		Fresh
Dalian Municipal Friendship Hospital of Dalian Medical University	PM00G18AS1423	F	49	Papillary Thyroid Cancer	1	1	0	0	Right	HRAS exon3:c.A182G:p.Q61R 3.04%;TERT C228T 1.19%	HRAS exon3:c.A182G:p.Q61R 3.04%;TERT C228T 1.19%	3.04%;1.19%	444	HRAS TERT		Fresh
Dali Bai Autonomous Prefecture People's Hospitle	PM00G19AE0095	F	46	Papillary Thyroid Cancer	1	x	1	0	Right	BRAF	BRAF exon15:c.T1799A:p.V600E	2.55%	452	BRAF	2.55%	Fresh
Dali Bai Autonomous Prefecture People's Hospitle	PM00G18AE0221	F	42	Papillary Thyroid Cancer	1	x	0	0	Left	BRAF exon15:c.T1799A:p.V600E 0.83%	BRAF exon15:c.T1799A:p.V600E	0.83%	446	BRAF	0.83%	Fresh
Dali Bai Autonomous Prefecture People's Hospitle	PM00G18AE0401	F	46	Papillary Thyroid Cancer	1	x	0	0	Left	BRAF exon15:c.T1799A:p.V600E 25.78%		0.2578	451	BRAF	0.2578	Fresh
Dali Bai Autonomous Prefecture People's Hospitle	PM00G18AE0219	F	53	Papillary Thyroid Cancer	2	x	0	0	Right	BRAF exon15:c.T1799A:p.V600E 11.35%	BRAF exon15:c.T1799A:p.V600E	11.35%	445	BRAF	11.35%	Fresh
Dali Bai Autonomous Prefecture People's Hospitle	PM00G18AE0180	F	67	Papillary Thyroid Cancer	2	x	0	0	Both	BRAF exon15:c.T1799A:p.V600E 3.96%	BRAF exon15:c.T1799A:p.V600E	3.96%	448	BRAF	3.96%	Fresh
Dali Bai Autonomous Prefecture People's Hospitle	PM00G18AE0177	F	46	Papillary Thyroid Cancer	2	x	1	0	Right	BRAF exon15:c.T1799A:p.V600E 0.34%		0.0034	449	BRAF	0.0034	Fresh
Dali Bai Autonomous Prefecture People's Hospitle	PM00G18AE0406	F	29	Papillary Thyroid Cancer	2	x	1	0	Right	BRAF exon15:c.T1799A:p.V600E 4.39%	BRAF exon15:c.T1799A:p.V600E	4.39%	450	BRAF	4.39%	Fresh
Dali Bai Autonomous Prefecture People's Hospitle	PM00G18AE0184	F	40	Papillary Thyroid Cancer	1	x	x	0	Left	BRAF exon15:c.T1799A:p.V600E 6.06%	BRAF exon15:c.T1799A:p.V600E	6.06%	447	BRAF	6.06%	Fresh
Xiangya Hospital of Central South University	PM00G18AW0803	F	30	Papillary Thyroid Cancer	1	1	1	0	Right	BRAF exon15:c.T1799A:p.V600E 1.13%	BRAF exon15:c.T1799A:p.V600E 1.13%	1.13%	8	BRAF	1.13%	FFPE
Xiangya Hospital of Central South University	PM00G18AW0999	M	30	Papillary Thyroid Cancer	1	1	1	0	Right	BRAF exon15:c.T1799A:p.V600E 7.12%		0.0712	17	BRAF	0.0712	Fresh
Xiangya Hospital of Central South University	PM00G19AW0032	F	29	Papillary Thyroid Cancer	1	x	0	0	Right	None	None	None	27	None		Fresh
Xiangya Hospital of Central South University	PM00G19AW0986	F	28	Papillary Thyroid Cancer	1	x	1	0	Right	BRAF	exon15:c.T1799A:p.V600E	3.35%	53	BRAF	3.35%	Fresh
Xiangya Hospital of Central South University	PM00G19AW0968	M	38	Papillary Thyroid Cancer	1	1	0	0	Right	BRAF	exon15:c.T1799A:p.V600E	9.96%	71	BRAF	9.96%	Fresh
Xiangya Hospital of Central South University	PM00G19AW0389	M	46	Papillary Thyroid Cancer	1	1	1	0	Right	BRAF	exon15:c.T1799A:p.V600E	5.77%	72	BRAF	5.77%	Fresh
The Fourth Affiliated Hospital of China Medical University	PM00G18AS0755	M	48	Papillary Thyroid Cancer	1	1	0	0	Right	KRAS exon2:c.G35T:p.G12V 0.29%；BRAF exon15:c.T1799A:p.V600E 15.37%	KRAS exon2:c.G35T:p.G12V；BRAF exon15:c.T1799A:p.V600E	0.29%；15.37%	95	BRAF KRAS	0.1537	Fresh
The First People's Hospital of Yunnan Provience	PM00G18AE0288	F	40	Papillary Thyroid Cancer	1	x	0	0	Right	None			123	None		Fresh
The First Affiliated Hospital of Qingdao University	PM00G19AN0232	F	54	Papillary Thyroid Cancer	1	x	x	0	Right	BRAF	BRAF exon15:c.T1799A:p.V600E	1.27%	241	BRAF	0.0127	FFPE
The First Affiliated Hospital of Qingdao University	PM00G19AN0084	F	43	Papillary Thyroid Cancer	1	x	x	0	Right	AFAP1L2_6:RET_12	None	None	242	RET AFAP1L2_6		Fresh
The First Affiliated Hospital of Qingdao University	PM00G18AN0452	F	55	Papillary Thyroid Cancer	1	1	x	0	Right	BRAF exon15:c.T1799A:p.V600E 10.46%	BRAF exon15:c.T1799A:p.V600E	10.46%	255	BRAF	10.46%	Fresh
The First Affiliated Hospital of Qingdao University	PM00G18AN0468	F	42	Papillary Thyroid Cancer	1	1	0	0	Right	BRAF exon15:c.T1799A:p.V600E 11.55%;PIK3CA exon21:c.A3140G:p.H1047R 0.35%	BRAF exon15:c.T1799A:p.V600E;PIK3CA exon21:c.A3140G:p.H1047R	11.55%；0.35%	257	BRAF PIK3CA	0.1155	Fresh
The First Affiliated Hospital of Qingdao University	PM00G18AN0463	M	37	Papillary Thyroid Cancer	1	1	x	0	Right	BRAF exon15:c.T1799A:p.V600E 28.62%	BRAF exon15:c.T1799A:p.V600E	28.62%	262	BRAF	28.62%	FFPE
The First Affiliated Hospital of Qingdao University	PM00G18AN0460	F	38	Papillary Thyroid Cancer	1	1	0	0	Right	BRAF exon15:c.T1799A:p.V600E 4.23%	BRAF exon15:c.T1799A:p.V600E	4.23%	265	BRAF	4.23%	FFPE
The First Affiliated Hospital of Qingdao University	PM00G18AN0522	M	29	Papillary Thyroid Cancer	1	x	x	0	Right	BRAF exon15:c.T1799A:p.V600E 6.67%	BRAF exon15:c.T1799A:p.V600E	6.67%	266	BRAF	6.67%	Fresh
The First Affiliated Hospital of Qingdao University	PM00G19AN0233	M	53	Papillary Thyroid Cancer	1	1	0	0	Right	BRAF	BRAF exon15:c.T1799A:p.V600E	1.23%	275	BRAF	1.23%	Fresh
The First Affiliated Hospital of Qingdao University	PM00G18AN0513	M	35	Papillary Thyroid Cancer	1	1	x	0	Right	KRAS exon3:c.C181A:p.Q61K 13.07%	KRAS exon3:c.C181A:p.Q61K	13.07%	284	KRAS		Fresh
The First Affiliated Hospital of Qingdao University	PM00G18AN0519	F	46	Papillary Thyroid Cancer	1	x	x	0	Right	BRAF exon15:c.T1799A:p.V600E 0.87%	BRAF exon15:c.T1799A:p.V600E	0.87%	285	BRAF	0.0087	Fresh
The First Affiliated Hospital of Qingdao University	PM00G18AN0451	F	49	Papillary Thyroid Cancer	1	x	x	0	Right	None	None	None	293	None		Fresh
The First Affiliated Hospital of Qingdao University	PM00G18AN0260	F	62	Papillary Thyroid Cancer	1	1	0	0	Right	None			295	None		Fresh
Shanxi Bethune Hospital, Shanxi Academy of Medical Sciences	PM00G18AY0094	F	39	Papillary Thyroid Cancer	1	1	0	0	Right	None			205	None		Fresh
Shanxi Bethune Hospital, Shanxi Academy of Medical Sciences	PM00G19AY0050	F	52	Papillary Thyroid Cancer	1	1	1	0	Right	BRAF exon15:c.T1799A:p.V600E 8.01%	BRAF exon15:c.T1799A:p.V600E	8.01%	224	BRAF	8.01%	FFPE
Shanxi Bethune Hospital, Shanxi Academy of Medical Sciences	PM00G19AY0046	F	34	Papillary Thyroid Cancer	1	1	1	0	Right	BRAF	BRAF exon15:c.T1799A:p.V600E	14.07%	226	BRAF	14.07%	Fresh
Shanxi Bethune Hospital, Shanxi Academy of Medical Sciences	PM00G19AY0079	F	53	Papillary Thyroid Cancer	1	1	0	0	Right	BRAF	BRAF exon15:c.T1799A:p.V600E	12.68%	236	BRAF	12.68%	Fresh
Shanxi Bethune Hospital, Shanxi Academy of Medical Sciences	PM00G19AY0097	F	56	Papillary Thyroid Cancer	1	1	1	0	Right	BRAF	BRAF exon15:c.T1799A:p.V600E	9.97%	239	BRAF	9.97%	Fresh
Shanxi Bethune Hospital, Shanxi Academy of Medical Sciences	PM00G19AY0103	F	50	Papillary Thyroid Cancer	1	1	0	0	Right	BRAF	BRAF exon15:c.T1799A:p.V600E	12.55%	240	BRAF	12.55%	Fresh
People's Hospital of Shanxi Provience	PM00G19AY0049	F	64	Papillary Thyroid Cancer	1	1	0	0	Right	BRAF	BRAF exon15:c.T1799A:p.V600E	3.99%	163	BRAF	3.99%	Fresh
People's Hospital of Shanxi Provience	PM00G19AY0074	F	55	Papillary Thyroid Cancer	1	x	0	0	Right	BRAF	BRAF exon15:c.T1799A:p.V600E	2.08%	175	BRAF	2.08%	FFPE
People's Hospital of Shanxi Provience	PM00G19AY0099	M	56	Papillary Thyroid Cancer	1	1	2	0	Right	BRAF	BRAF exon15:c.T1799A:p.V600E	2.68%	178	BRAF	2.68%	FFPE
People's Hospital of Shanxi Provience	PM00G19AY0107	F	27	Papillary Thyroid Cancer	1	1	1	0	Right	BRAF	BRAF exon15:c.T1799A:p.V600E	19.13%	183	BRAF	19.13%	FFPE
People's Hospital of Shanxi Provience	PM00G19AY0105	M	51	Papillary Thyroid Cancer	1	1	1	0	Right	BRAF	BRAF exon15:c.T1799A:p.V600E	4.36%	185	BRAF	4.36%	FFPE
People's Hospital of Shanxi Provience	PM00G19AY0121R	F	62	Papillary Thyroid Cancer	1	4	0	0	Right	BRAF	BRAF exon15:c.T1799A:p.V600E	18.6%	195	BRAF	18.6%	Fresh
China-Japan Friendship Hospital	PM00G18AB0882	F	24	Papillary Thyroid Cancer	1	1	1	0	Right	BRAF exon15:c.T1799A:p.V600E 39.04%		0.3904	3	BRAF	0.3904	FFPE
China-Japan Friendship Hospital	PM00G18AB1114	F	68	Papillary Thyroid Cancer	1	1	0	0	Right	BRAF exon15:c.T1799A:p.V600E 9.41%		0.0941	4	BRAF	0.0941	Fresh

## Sheet: Sheet2
T分期	N分期	原发肿瘤位置	SNV、indel频率	患者id	基因
1	0	双	1.18%	69	BRAF
1	1	左	1.47%	11	BRAF
x	0	双	8.48%	14	BRAF
1	0	右	14.78%	18	BRAF
1	0	右	3.42%	76	BRAF
1	1	右	2.6%	70	BRAF
1	1	右	5.13%	7	BRAF
1	1	左	23.76%	16	BRAF
1	0	左	1.42%	15	BRAF
1	2	右	9.27%	79	BRAF
1	1	双	14.49%	12	BRAF
1	1	右	1.13%	8	BRAF
1	1	右	0.0712	17	BRAF
1	1	双	5.22%	10	BRAF
x	x	右	15.06%	9	BRAF
x	0	右	6.53%	5	BRAF
x	x	左	11.71%	13	BRAF
1	2	右	3.17%	6	BRAF
1	1	右	0.40%	372	BRAF
x	0	右	5.71%	375	BRAF
1	1	右	5.77%	72	BRAF
1	0	双	1.96%	395	BRAF
1	1	左	24.84%	363	BRAF
1	1	右	2.89%	378	BRAF
1	1	左	1.72%	394	BRAF
1	1	双	3.50%	393	BRAF
1	1	左	0.5%	376	BRAF
1	0	右	13.18%	371	BRAF
1	0	右	25.19%	302	BRAF
1	0	右	3.82%	367	BRAF
x	1	左	0.1753	329	BRAF
x	2	右	0.2529	332	BRAF
x	1	双	1.07%	360	BRAF
1	2	双	2.13%	21	BRAF
2	2	双	0.68%	73	BRAF
1	0	双	6.06%	22	BRAF
1	0	左	0.1836	19	BRAF
1	1	双	5.98%	25	BRAF
1	2	双	22.04%	74	BRAF
1	0	左	5.12%	24	BRAF
x	x	右	12.95%	26	BRAF
1	1	左	2.56%	75	BRAF
1	0	左	1.65%	20	BRAF
1	2	双	10.87%	37	BRAF
1	0	右	12.91%	39	BRAF
2	2	右	1.33%	28	BRAF
1	0	右	3.51%	30	BRAF
1	1	右	19.43%	32	BRAF
1	2	双	8.62%	58	BRAF
x	1	右	3.35%	53	BRAF
1	2	左	2.81%	31	BRAF
1	1	右	2.99%	47	BRAF
1	1	左	1.67%	61	BRAF
x	1	双	0.0499	323	BRAF
x	1	右	0.0044	324	BRAF
x	0	双		320	BRAF
x	0	右	0.0112	305	BRAF
x	0	右	0.1081	306	BRAF
x	0	右	0.1081	307	BRAF
x	0	右	0.3321	310	BRAF
x	1	右	0.0436	309	BRAF
x	0	双	0.0118	308	BRAF
x	1	右	0.0122	313	BRAF
x	1	左	0.1274	311	BRAF
x	0	右	0.0154	316	BRAF
x	1	左	0.0091	312	BRAF
x	1	右		314	BRAF
3	1	左	0.1433	317	BRAF
x	0	右		318	BRAF
x	0	右		325	BRAF
x	0	双		319	BRAF
x	0	右	0.0251	322	BRAF
1	2	右	13.23%	44	BRAF
1	0	左	4.88%	36	BRAF
3	2	右	15.35%	45	BRAF
x	1	双	5.73%	35	BRAF
1	1	右	4.15%	38	BRAF
2	2	右	18.43%	40	BRAF
x	1	右	15.39%	52	BRAF
x	1	左	1.51%	60	BRAF
x	1	双	8.08%	50	BRAF
1	1	双	4.68%	56	BRAF
1	0	左	3.12%	59	BRAF
1	1	双	6.82%	55	BRAF
1	1	双	25.04%	54	BRAF
1	2	双	18.69%	57	BRAF
1	0	左	3.17%	64	BRAF
3	1	右	8.42%	41	BRAF
1	1	左	7.61%	42	BRAF
1	2	左	23.31%	43	BRAF
2	2	双	31.86%	48	BRAF
2	0	左	2.21%	65	BRAF
1	0	右	0.22%	354	BRAF
x	0	双	22.06%	340	BRAF
1	0	右	0.0533	335	BRAF
1	0	右	0.64%	423	BRAF
x	1	左	1.12%	343	BRAF
1	1	右	16.52%	420	BRAF
1	0	右	2.30%	433	BRAF
x	1	左	13.92%	349	BRAF
1	1	右		401	BRAF
x	0	右	2.30%	338	BRAF
x	1	左	0.1992	336	BRAF
x	1	双	0.94%	353	BRAF
1	0	双	9.61%	274	BRAF
1	2	右	10.56%	256	BRAF
x	x	右	0.87%	285	BRAF
3	2	右	7.84%	283	BRAF
1	0	左	14.3%;15.6%	251	BRAF
1	1	双	10.79%	270	BRAF
x	x	右	22.85%	282	BRAF
x	x	左	0.27%	246	BRAF
1	x	左	0.29%	272	BRAF
x	x	右	26.24%	261	BRAF
x	x	左	7.42%	263	BRAF
1	x	右	10.46%	255	BRAF
x	x	右	6.67%	266	BRAF
x	x	左	1.81%	249	BRAF
x	x	左	32.43%	269	BRAF
1	2	右	2.41%	259	BRAF
1	2	左	18.18%	252	BRAF
1	1	双	5.19%	243	BRAF
x	x	右	9.98%	279	BRAF
x	x	左	12.42%	250	BRAF
1	1	右	0.93%	253	BRAF
1	0	左	15.80%	273	BRAF
x	x	右	16.72%	276	BRAF
x	x	右	1.80%	278	BRAF
1	x	右	28.62%	262	BRAF
x	x	右	35.20%	277	BRAF
1	0	双	0.49%	244	BRAF
1	2	左	14.82%	268	BRAF
x	x	左	0.34%	247	BRAF
1	0	右	15.3%	258	BRAF
1	1	双	6.88%	245	BRAF
1	0	右	1.23%	275	BRAF
x	x	右	8.43%	267	BRAF
x	x	左	5.35%	281	BRAF
1	2	右	1.39%	280	BRAF
1	0	右	4.23%	265	BRAF
1	0	双	0.7%	406	BRAF
1	2	双	5.6%	408	BRAF
1	0	右	3.9%	405	BRAF
1	1	双	3.02%	416	BRAF
1	0	左	7.08%	398	BRAF
1	0	双	10.64%	428	BRAF
1	0	左	14.15%	235	BRAF
1	0	右	0.52%	233	BRAF
x	1	右	0.54%	117	BRAF
x	1	左	4.92%	118	BRAF
x	0	右	0.56%	101	BRAF
1	0	右	38.34%	418	BRAF
x	1	左	18.79%	98	BRAF
x	0	左	5.62%	99	BRAF
x	0	左	36.12%	107	BRAF
x	0	双	0.57%	119	BRAF
x	0	右	1.72%	114	BRAF
x	2	右	10.49%	112	BRAF
x	0	右	2.55%	361	BRAF
x	2	右	0.0524	103	BRAF
3	0	左	20.76%	189	BRAF
x	0	右	0.94%	109	BRAF
x	2	双	2.05%	113	BRAF
3	2	右	21.91%	176	BRAF
x	x	左	16.66%	432	BRAF
x	1	右	4.39%	450	BRAF
1	0	右	3.99%	163	BRAF
1	0	左	1.34%	232	BRAF
1	1	左	0.1071	220	BRAF
1	2	右	11.35%	167	BRAF
1	0	右	0.1427	333	BRAF
1	0	左	7.58%	425	BRAF
3	2	右	0.0838	337	BRAF
x	0	双	3.96%	448	BRAF
1	1	双	10.77%	419	BRAF
x	1	双	0.38%	352	BRAF
x	0	左	2.23%	357	BRAF
1	1	双	28.57%	209	BRAF
1	2	右	2.68%	178	BRAF
1	0	双	12.38%	166	BRAF
x	0	右	2.08%	175	BRAF
1	0	右	3.99%	164	BRAF
x	1	右	5.22%	434	BRAF
x	1	右	0.0191	327	BRAF
x	1	双	0.0208	330	BRAF
x	1	右	0.62%	350	BRAF
1	0	左	4.39%	169	BRAF
x	0	左	0.2578	451	BRAF
x	0	左	0.83%	446	BRAF
4	2	左	25.03%	136	BRAF
3	1	左	36.07%	139	BRAF
4	2	左	38.34%	135	BRAF
2	2	右	36.3%	145	BRAF
3	2	右	19.9%	140	BRAF
4	2	右	27.05%	141	BRAF
1	2	左	34.72%	138	BRAF
x	1	右	0.11%	116	BRAF
1	0	右	6.14%	399	BRAF
1	1	左	4.51%	204	BRAF
3	0	左	21.66%	193	BRAF
x	1	左	0.335	328	BRAF
1	1	左	32.21%	181	BRAF
x	x	左	6.06%	447	BRAF
x	0	右	11.35%	445	BRAF
1	1	双	18.34%	207	BRAF
2	0	左	0.2%	410	BRAF
1	0	左	0.475%	404	BRAF
4	0	右	18.6%	195	BRAF
x	0	左	0.75%	196	BRAF
x	1	右	0.0034	449	BRAF
3	1	双	13.30%	206	BRAF
1	1	双	18.50%	188	BRAF
3	1	左	18.53%	187	BRAF
x	1	双	11.76%	179	BRAF
1	0	右	9.47%	184	BRAF
3	1	右	1.15%	197	BRAF
3	2	左	0.85%	194	BRAF
1	1	右	0.0922	334	BRAF
x	0	右	10.19%	345	BRAF
1	1	右	0.3904	3	BRAF
1	0	左	0.0483	1	BRAF
1	0	右	0.0941	4	BRAF
x	1	双	0.1735	321	BRAF
1	0	左	9.86%	271	BRAF
1	0	左	20.25%	182	BRAF
1	0	右	12.68%	236	BRAF
1	0	右	12.55%	240	BRAF
x	1	右	2.55%	452	BRAF
1	1	右	19.13%	183	BRAF
1	1	右	16.92%	225	BRAF
2	1	左	37.33%	238	BRAF
2	2	左	36.14%	227	BRAF
1	0	左	0.75%	190	BRAF
2	0	双	4.03%	234	BRAF
1	1	右	14.07%	226	BRAF
x	0	双	0.1081	102	BRAF
1	1	左	38.27%	212	BRAF
1	1	左	5.31%	213	BRAF
1	0	右	9.54%	214	BRAF
1	0	左	2.30%	180	BRAF
1	0	双	0.79%	230	BRAF
1	1	右	4.36%	185	BRAF
1	1	右	9.97%	239	BRAF
1	1	双	31.48%	237	BRAF
1	1	双	0.0172	202	BRAF
1	2	左	0.0423	201	BRAF
1	1	右	0.2961	221	BRAF
x	0	左	0.88%	126	BRAF
x	1	双	0.1402	124	BRAF
1	1	左	14.62%	210	BRAF
x	2	双	0.0304	125	BRAF
1	1	双	3.61%	211	BRAF
1	1	右	8.01%	224	BRAF
3	1	双	12.42%	301	BRAF
1	0	左	0.2501	379	BRAF
1	0	左	3.77%	431	BRAF
1	1	双	0.87%	427	BRAF
1	2	左	15.20%	186	BRAF
1	0	左	0.44%	229	BRAF
1	1	双	12.23%	429	BRAF
1	1	右	0.0118	219	BRAF
1	1	双	20.10%	81	BRAF
x	1	双	26.10%	88	BRAF
x	1	右	34.65%	160	BRAF
1	0	双	5.79%	377	BRAF
1	1	左	8.06%	369	BRAF
1	0	左	0.68%	413	BRAF
1	0	右	9.96%	71	BRAF
1	1	双	33.77%	63	BRAF
1	1	右	19.78%	403	BRAF
3	1	双	24.01%	421	BRAF
1	2	右	5.85%	400	BRAF
2	2	双	39.08%	198	BRAF
1	0	左	1.13%	86	BRAF
1	1	左	0.2008	162	BRAF
2	0	左	14.29%	365	BRAF
x	1	右	16.75%	373	BRAF
1	0	左	18.21%	386	BRAF
x	2	右	29.14%	383	BRAF
x	1	左	3.14%	366	BRAF
3	1	左	0.4165	218	BRAF
1	1	双	6.81%	374	BRAF
1	1	左	8.49%	161	BRAF
1	1	双	9.18%	216	BRAF
1	1	左	14.05%	85	BRAF
x	x	右	1.27%	241	BRAF
x	x	左	1.08%	248	BRAF
x	x	左	2.55%	254	BRAF
x	x	右	23.6%	260	BRAF
x	x	左	0.41%	288	BRAF
x	0	右	2.55%	361	BRAF
1	0	左	1.32%; 20.62%	387	BRAF KRAS
1	2	双	1.17% ；1.13%	67	BRAF KRAS
1	0	右	0.29%；15.37%	95	BRAF KRAS
1	2	左	7.23%；6.43%	62	BRAF PIK3CA
1	0	右	11.55%；0.35%	257	BRAF PIK3CA
1	2	左	20% ；16.07%	49	BRAF TERT
4	0	左	41.66% 46.11%	92	BRAF TERT
4	2	左	14.45% 4.83%	94	BRAF TERT
x	1	左	41.78%，36.81%	339	BRAF TERT
1	0	左	21.01% 16.47%	177	BRAF TERT
2	2	双	30.20%； 22.38%	392	BRAF TERT
3	0	双	4.83%; 42.52%	80	BRAF TERT
x	1	双	0.57%	346	EGFR
2	0	左	12.25%	231	HRAS
1	0	右	3.04%;1.19%	444	HRAS TERT
1	0	右	1.3%	77	KRAS
1	x	右	13.07%	284	KRAS
1	1	双	0.30%	370	KRAS
4	1	双	35.04% ；32.37%	148	BRAF TERT RET ACBD5
3	2	左	14.77%	147	BRAF RET ACBD5
1	2	右	无	165	RET ACBD5
x	x	右	无	242	RET AFAP1L2_6
3	1	右	20.33%	150	BRAF RET C10orf118_15
3	2	双	无	170	RET CCDC6
2	2	右	无	155	RET CCDC6
4	2	双	15.65%	134	BRAF RET CCDC6
4	2	左	36%	142	BRAF RET CCDC6
3	2	右		153	RET CCDC6
2	2	双		133	RET CCDC6
4	2	右	无	152	RET CCDC6
4	2	双	20.05%	151	BRAF RET CCDC6
1	1	左		222	RET CCDC6
1	1	双		215	RET CCDC6
1	2	右	无	411	RET CCDC6
x	2	右		287	RET CCDC6
4	2	双		91	RET ERC1
x	1	左	无	66	RET intergenic_JMJD1C_REEP3:RET_12
3	2	右	16.94%	156	BRAF RET intergenic_JMJD1C_REEP3:RET_12
x	1	右		347	RET NCOA4
1	1	右		217	RET NCOA4
2	2	左	无	146	RET NCOA4
2	2	右	11.4%	157	BRAF RET NCOA4
4	0	双		223	RET NCOA4
x	0	左	无	389	RET NCOA4
1	1	右	无	68	RET NCOA4
x	2	右		110	RET NCOA4 CELF2
1	1	左	无	384	无
1	1	左	无	78	无
1	0	左		381	无
1	0	双	无	385	无
x	1	左	无	391	无
1	1	右	无	382	无
x	1	左	无	390	无
1	0	右	无	364	无
x	1	双	无	396	无
x	1	左	无	341	无
x	1	右	无	355	无
x	0	右	无	23	无
x	0	右	无	27	无
1	1	双	无	29	无
x	0	双		326	无
x	0	左	#N/A	303	无
x	0	左		315	无
x	0	左	无	435	无
x	0	双	无	359	无
1	0	双	无	407	无
1	0	右	无	424	无
1	1	双		331	无
x	2	右		351	无
1	0	左	无	417	无
x	2	双	无	172	无
x	0	右		123	无
x	0	左	无	115	无
1	0	右		295	无
x	x	右	无	293	无
x	x	右	无	291	无
x	x	左	无	296	无
1	x	左	无	299	无
1	1	左	无	297	无
2	2	双		298	无
1	1	右	无	290	无
1	0	右	无	292	无
1	x	右	无	289	无
1	0	右	无	412	无
1	1	双	无	409	无
x	0	双	无	100	无
x	1	右		121	无
x	1	左		108	无
x	0	右		106	无
1	1	双		203	无
x	1	双	无	358	无
2	2	左	无	168	无
1	2	左	无	159	无
x	2	双		120	无
x	x	右	无	356	无
1	0	右	无	414	无
x	1	左	无	344	无
x	0	右		104	无
1	0	右		205	无
1	0	左		200	无
1	1	左		208	无
1	0	左		426	无
1	0	左		430	无
1	1	双	无	397	无
x	1	右	无	294	无

## Sheet: Sheet3
Sample number	Gene mutation/fusion event	Sample type	Sample type
PM00G18AB0882	BRAF	口腔拭子;新鲜手术组织;	Fresh
PM00G18AB1114	BRAF	口腔拭子;新鲜手术组织;	Fresh
PM00G18AW0803	BRAF	口腔拭子;其他:手术石蜡卷片	FFPE
PM00G18AW0999	BRAF	口腔拭子;其他:手术石蜡卷片	FFPE
PM00G19AW0032	None	口腔拭子;其他:手术石蜡卷片	FFPE
PM00G19AW0986	BRAF	口腔拭子;其他:手术石蜡卷片	FFPE
PM00G19AW0968	BRAF	口腔拭子;其他:手术石蜡卷片	FFPE
PM00G19AW0389	BRAF	口腔拭子;手术石蜡切片;	FFPE
PM00G18AS0755	BRAF KRAS	口腔拭子;手术石蜡切片;	FFPE
PM00G18AE0288	None	外周血;手术石蜡切片;	FFPE
PM00G19AY0049	BRAF	口腔拭子;新鲜手术组织;	Fresh
PM00G19AY0074	BRAF	口腔拭子;新鲜手术组织;	Fresh
PM00G19AY0099	BRAF	口腔拭子;新鲜手术组织;	Fresh
PM00G19AY0107	BRAF	口腔拭子;新鲜手术组织;	Fresh
PM00G19AY0105	BRAF	口腔拭子;新鲜手术组织;	Fresh
PM00G19AY0121R	BRAF	其他:手术石蜡卷片	FFPE
PM00G18AY0094	None	口腔拭子;其他:手术石蜡卷片	FFPE
PM00G19AY0050	BRAF	口腔拭子;新鲜手术组织;	Fresh
PM00G19AY0046	BRAF	口腔拭子;新鲜手术组织;	Fresh
PM00G19AY0079	BRAF	口腔拭子;新鲜手术组织;	Fresh
PM00G19AY0097	BRAF	口腔拭子;新鲜手术组织;	Fresh
PM00G19AY0103	BRAF	口腔拭子;新鲜手术组织;	Fresh
PM00G19AN0232	BRAF	外周血;新鲜手术组织;	Fresh
PM00G19AN0084	RET AFAP1L2_6	外周血;新鲜手术组织;	Fresh
PM00G18AN0452	BRAF	外周血;新鲜手术组织;	Fresh
PM00G18AN0468	BRAF PIK3CA	外周血;新鲜手术组织;	Fresh
PM00G18AN0463	BRAF	外周血;新鲜手术组织;	Fresh
PM00G18AN0460	BRAF	外周血;新鲜手术组织;	Fresh
PM00G18AN0522	BRAF	外周血;新鲜手术组织;	Fresh
PM00G19AN0233	BRAF	外周血;新鲜手术组织;	Fresh
PM00G18AN0513	KRAS	外周血;新鲜手术组织;	Fresh
PM00G18AN0519	BRAF	外周血;新鲜手术组织;	Fresh
PM00G18AN0451	None	外周血;新鲜手术组织;	Fresh
PM00G18AN0260	None	外周血;新鲜手术组织;	Fresh
PM00G19AS0186	BRAF	口腔拭子;新鲜手术组织;	Fresh
PM00G18AS0384	BRAF	手术石蜡切片;	FFPE
PM00G18AS0380	BRAF	手术石蜡切片;	FFPE
PM00G18AS0379	BRAF	手术石蜡切片;	FFPE
PM00G18AS0263	BRAF	手术石蜡切片;	FFPE
PM00G18AS1021	BRAF	新鲜手术组织;	Fresh
PM00G18AS1007	BRAF	手术石蜡切片;	FFPE
PM00G18AS0978	BRAF	新鲜手术组织;	Fresh
PM00G18AS0935	BRAF	新鲜手术组织;	Fresh
PM00G18AS0934	BRAF	手术石蜡切片;	FFPE
PM00G18AS0931	BRAF	手术石蜡切片;	FFPE
PM00G18AS0908	BRAF	手术石蜡切片;	FFPE
PM00G18AS0910	BRAF	手术石蜡切片;	FFPE
PM00G18AS0902	BRAF	口腔拭子;手术石蜡切片;	FFPE
PM00G18AS0892	BRAF	口腔拭子;新鲜手术组织;	Fresh
PM00G18AS0881	BRAF	口腔拭子;手术石蜡切片;	FFPE
PM00G18AS0846	BRAF	口腔拭子;新鲜手术组织;	Fresh
PM00G18AS0836	RET NCOA4	口腔拭子;新鲜手术组织;	Fresh
PM00G18AS1117	BRAF	口腔拭子;新鲜手术组织;	Fresh
PM00G18AS1081	BRAF	口腔拭子;新鲜手术组织;	Fresh
PM00G18AS1087	None	口腔拭子;新鲜手术组织;	Fresh
PM00G18AS1097	None	口腔拭子;新鲜手术组织;	Fresh
PM00G18AS1460	BRAF	口腔拭子;新鲜手术组织;	Fresh
PM00G18AS1460	BRAF	口腔拭子;新鲜手术组织;	Fresh
PM00G18AS1424	None	口腔拭子;新鲜手术组织;	Fresh
PM00G18AS1413	BRAF	口腔拭子;新鲜手术组织;	Fresh
PM00G19AS0190	BRAF	口腔拭子;新鲜手术组织;	Fresh
PM00G19AS0180	BRAF	口腔拭子;手术石蜡切片;	FFPE
PM00G19AS0161	BRAF	口腔拭子;新鲜手术组织;	Fresh
PM00G19AS0145	BRAF	口腔拭子;新鲜手术组织;	Fresh
PM00G19AS0122	None	口腔拭子;新鲜手术组织;	Fresh
PM00G19AS0123	BRAF	口腔拭子;新鲜手术组织;	Fresh
PM00G19AS0037	BRAF	口腔拭子;手术石蜡切片;	FFPE
PM00G19AS0033	BRAF	口腔拭子;新鲜手术组织;	Fresh
PM00G19AS0664	RET CCDC6	口腔拭子;新鲜手术组织;	Fresh
PM00G19AS0642	None	口腔拭子;新鲜手术组织;	Fresh
PM00G19AS0624	BRAF	口腔拭子;新鲜手术组织;	Fresh
PM00G19AS0376	BRAF	口腔拭子;新鲜手术组织;	Fresh
PM00G19AS0377	BRAF	口腔拭子;新鲜手术组织;	Fresh
PM00G19AS0378	None	口腔拭子;新鲜手术组织;	Fresh
PM00G19AS0364	BRAF	口腔拭子;新鲜手术组织;	Fresh
PM00G18AB0772	BRAF	新鲜手术组织;	Fresh
PM00G19AS0354	BRAF	口腔拭子;新鲜手术组织;	Fresh
PM00G18AS1423	HRAS TERT	口腔拭子;手术石蜡切片;	FFPE
PM00G19AE0095	BRAF	口腔拭子;手术石蜡切片;	FFPE
PM00G19AW0415	BRAF	口腔拭子;其他:手术石蜡卷片	FFPE
PM00G19AW0978	BRAF	口腔拭子;其他:手术石蜡卷片	FFPE
PM00G19AW0412	RET intergenic_JMJD1C_REEP3:RET_12	口腔拭子;其他:手术石蜡卷片	FFPE
PM00G18AB1007	BRAF	口腔拭子;新鲜手术组织;	Fresh
PM00G18AB1008	BRAF	口腔拭子;手术石蜡切片;	FFPE
PM00G18AE0166	BRAF	新鲜手术组织;	Fresh
PM00G18AE0165	BRAF	新鲜手术组织;	Fresh
PM00G19AL0113	BRAF	口腔拭子;新鲜手术组织;	Fresh
PM00G18AY0129	BRAF	口腔拭子;新鲜手术组织;	Fresh
PM00G18AY0121	BRAF	口腔拭子;新鲜手术组织;	Fresh
PM00G19AY0037	BRAF	口腔拭子;新鲜手术组织;	Fresh
PM00G19AY0096	BRAF TERT	口腔拭子;新鲜手术组织;	Fresh
PM00G19AY0101	BRAF	口腔拭子;新鲜手术组织;	Fresh
PM00G19AY0108	BRAF	口腔拭子;新鲜手术组织;	Fresh
PM00G19AY0098	BRAF	口腔拭子;新鲜手术组织;	Fresh
PM00G19AY0104	BRAF	口腔拭子;新鲜手术组织;	Fresh
PM00G19AY0117	BRAF	口腔拭子;新鲜手术组织;	Fresh
PM00G19AY0118	BRAF	口腔拭子;新鲜手术组织;	Fresh
PM00G19AY0125	BRAF	口腔拭子;新鲜手术组织;	Fresh
PM00G18AY0104	None	口腔拭子;新鲜手术组织;	Fresh
PM00G18AY0088	None	口腔拭子;新鲜手术组织;	Fresh
PM00G18AY0135	BRAF	口腔拭子;新鲜手术组织;	Fresh
PM00G19AY0041	BRAF	口腔拭子;新鲜手术组织;	Fresh
PM00G19AY0039	BRAF	口腔拭子;新鲜手术组织;	Fresh
PM00G19AY0071	BRAF	口腔拭子;新鲜手术组织;	Fresh
PM00G19AY0035	BRAF	口腔拭子;新鲜手术组织;	Fresh
PM00G19AY0057	BRAF	口腔拭子;新鲜手术组织;	Fresh
PM00G18AN0467	BRAF	外周血;新鲜手术组织;	Fresh
PM00G19AN0071	BRAF	外周血;新鲜手术组织;	Fresh
PM00G18AN0461	BRAF	外周血;新鲜手术组织;	Fresh
PM00G18AN0449	BRAF	外周血;新鲜手术组织;	Fresh
PM00G18AN0319	BRAF	外周血;新鲜手术组织;	Fresh
PM00G18AN0321	BRAF	外周血;新鲜手术组织;	Fresh
PM00G18AS1465	None	口腔拭子;新鲜手术组织;	Fresh
PM00G19AN0209	BRAF	外周血;新鲜手术组织;	Fresh
PM00G19AN0085	None	外周血;新鲜手术组织;	Fresh
PM00G18AS0151	None	手术石蜡切片;	FFPE
PM00G18AS0662	BRAF	手术石蜡切片;	FFPE
PM00G18AS1018	None	手术石蜡切片;	FFPE
PM00G18AS0992	BRAF	手术石蜡切片;	FFPE
PM00G18AS0923	BRAF	新鲜手术组织;	Fresh
PM00G18AS0922	BRAF	手术石蜡切片;	FFPE
PM00G19AS0118	None	口腔拭子;新鲜手术组织;	Fresh
PM00G18AS0859	BRAF TERT	口腔拭子;手术石蜡切片;	FFPE
PM00G18AS0875	None	口腔拭子;新鲜手术组织;	Fresh
PM00G18AS0867	BRAF	口腔拭子;新鲜手术组织;	Fresh
PM00G18AS0869	None	口腔拭子;新鲜手术组织;	Fresh
PM00G18AS0823	BRAF	口腔拭子;新鲜手术组织;	Fresh
PM00G18AS1077	BRAF	口腔拭子;新鲜手术组织;	Fresh
PM00G18AS1432	BRAF	口腔拭子;新鲜手术组织;	Fresh
PM00G18AS1420	BRAF	口腔拭子;新鲜手术组织;	Fresh
PM00G19AS0119	None	口腔拭子;新鲜手术组织;	Fresh
PM00G19AS0112	BRAF	口腔拭子;新鲜手术组织;	Fresh
PM00G19AS0098	BRAF KRAS	口腔拭子;新鲜手术组织;	Fresh
PM00G19AS0064	BRAF	口腔拭子;手术石蜡切片;	FFPE
PM00G19AS0683	BRAF	口腔拭子;新鲜手术组织;	Fresh
PM00G19AS0387	BRAF	口腔拭子;新鲜手术组织;	Fresh
PM00G19AS0631	None	口腔拭子;新鲜手术组织;	Fresh
PM00G19AS0389	BRAF	口腔拭子;新鲜手术组织;	Fresh
PM00G19AS0370	None	口腔拭子;新鲜手术组织;	Fresh
PM00G19AS0363	BRAF	口腔拭子;新鲜手术组织;	Fresh
PM00G19AS0355	None	口腔拭子;新鲜手术组织;	Fresh
PM00G18AE0221	BRAF	口腔拭子;手术石蜡切片;	FFPE
PM00G18AE0401	BRAF	口腔拭子;手术石蜡切片;	FFPE
PM00G18AW0802	BRAF	手术石蜡切片;	FFPE
PM00G18AW0795	BRAF	口腔拭子;手术石蜡切片;	FFPE
PM00G18AW0798	BRAF	口腔拭子;其他:手术石蜡卷片	FFPE
PM00G18AW0867	BRAF	口腔拭子;其他:手术石蜡卷片	FFPE
PM00G18AW0866	BRAF	口腔拭子;其他:手术石蜡卷片	FFPE
PM00G18AW0910	BRAF	其他:手术石蜡卷片	FFPE
PM00G18AW0912	BRAF	口腔拭子;其他:手术石蜡卷片	FFPE
PM00G19AW0092	BRAF	口腔拭子;手术石蜡切片;	FFPE
PM00G19AW0079	BRAF	口腔拭子;手术石蜡切片;	FFPE
PM00G19AW0078	BRAF	口腔拭子;手术石蜡切片;	FFPE
PM00G19AW0080	BRAF	口腔拭子;手术石蜡切片;	FFPE
PM00G19AW0075	BRAF	口腔拭子;手术石蜡切片;	FFPE
PM00G19AW0085	None	口腔拭子;其他:手术石蜡卷片	FFPE
PM00G19AW0074	BRAF	口腔拭子;其他:手术石蜡卷片	FFPE
PM00G19AW0287	BRAF	口腔拭子;其他:手术石蜡卷片	FFPE
PM00G19AW0196	BRAF	口腔拭子;其他:手术石蜡卷片	FFPE
PM00G19AW0286	BRAF	口腔拭子;其他:手术石蜡卷片	FFPE
PM00G19AW0996	BRAF	口腔拭子;其他:手术石蜡卷片	FFPE
PM00G19AW0990	BRAF	口腔拭子;手术石蜡切片;	FFPE
PM00G19AW0987	BRAF	口腔拭子;其他:手术石蜡卷片	FFPE
PM00G19AW0993	BRAF	口腔拭子;其他:手术石蜡卷片	FFPE
PM00G19AW0982	BRAF	口腔拭子;手术石蜡切片;	FFPE
PM00G19AW0416	BRAF	口腔拭子;其他:手术石蜡卷片	FFPE
PM00G19AW0417	BRAF	口腔拭子;其他:手术石蜡卷片	FFPE
PM00G19AW0418	BRAF	口腔拭子;其他:手术石蜡卷片	FFPE
PM00G19AW0421	BRAF	口腔拭子;其他:手术石蜡卷片	FFPE
PM00G19AW0979	BRAF	口腔拭子;其他:手术石蜡卷片	FFPE
PM00G19AW0985	BRAF TERT	口腔拭子;其他:手术石蜡卷片	FFPE
PM00G19AW0419	BRAF	口腔拭子;其他:手术石蜡卷片	FFPE
PM00G19AW0973	BRAF PIK3CA	口腔拭子;其他:手术石蜡卷片	FFPE
PM00G19AW0974	BRAF	口腔拭子;其他:手术石蜡卷片	FFPE
PM00G19AW0409	BRAF	口腔拭子;手术石蜡切片;	FFPE
PM00G19AW0411	BRAF	口腔拭子;其他:手术石蜡卷片	FFPE
PM00G19AW0098	BRAF	口腔拭子;其他:手术石蜡卷片	FFPE
PM00G18AW0799	None	口腔拭子;手术石蜡切片;	FFPE
PM00G19AW0413	BRAF KRAS	口腔拭子;其他:手术石蜡卷片	FFPE
PM00G19AW0965	BRAF	口腔拭子;手术石蜡切片;	FFPE
PM00G19AW0076	BRAF	口腔拭子;其他:手术石蜡卷片	FFPE
PM00G19AW0073	BRAF	口腔拭子;其他:手术石蜡卷片	FFPE
PM00G19AB0111	BRAF TERT	新鲜穿刺组织;口腔拭子;	Fresh
PM00G19AB0098	BRAF TERT	口腔拭子;手术石蜡切片;	FFPE
PM00G18AB0774	BRAF TERT	新鲜手术组织;	Fresh
PM00G18AB0814	BRAF	新鲜手术组织;	Fresh
PM00G18AE0241	BRAF	新鲜手术组织;	Fresh
PM00G18AE0240	None	新鲜手术组织;	Fresh
PM00G18AB1084	BRAF	口腔拭子;新鲜手术组织;	Fresh
PM00G18AB1086	RET ERC1	口腔拭子;新鲜手术组织;	Fresh
PM00G18AE0253	None	新鲜手术组织;	Fresh
PM00G18AE0310	BRAF	外周血;新鲜手术组织;	Fresh
PM00G18AE0361	BRAF	外周血;新鲜手术组织;	Fresh
PM00G19AL0097	BRAF	口腔拭子;新鲜手术组织;	Fresh
PM00G18AE0167	None	新鲜手术组织;	Fresh
PM00G18AE0245	BRAF	新鲜手术组织;	Fresh
PM00G18AL0197	BRAF	口腔拭子;新鲜手术组织;	Fresh
PM00G18AL0196	BRAF	口腔拭子;新鲜手术组织;	Fresh
PM00G18AE0256	BRAF	外周血;新鲜手术组织;	Fresh
PM00G19AL0104	BRAF RET CCDC6	口腔拭子;新鲜手术组织;	Fresh
PM00G19AL0106	RET NCOA4	口腔拭子;新鲜手术组织;	Fresh
PM00G18AE0311	BRAF	外周血;新鲜手术组织;	Fresh
PM00G18AE0304	None	外周血;新鲜手术组织;	Fresh
PM00G18AE0279	BRAF	手术石蜡切片;	FFPE
PM00G18AE0372	BRAF	外周血;新鲜手术组织;	Fresh
PM00G19AL0115	BRAF RET ACBD5	口腔拭子;新鲜手术组织;	Fresh
PM00G19AL0100	RET CCDC6	口腔拭子;新鲜手术组织;	Fresh
PM00G19AL0102	BRAF RET CCDC6	口腔拭子;新鲜手术组织;	Fresh
PM00G18AL0198	None	口腔拭子;新鲜手术组织;	Fresh
PM00G19AY0042	None	口腔拭子;新鲜手术组织;	Fresh
PM00G19AY0102	BRAF	口腔拭子;新鲜手术组织;	Fresh
PM00G19AY0122	BRAF	口腔拭子;新鲜手术组织;	Fresh
PM00G19AY0123	BRAF	口腔拭子;新鲜手术组织;	Fresh
PM00G18AY0103	BRAF	外周血;新鲜手术组织;	Fresh
PM00G18AY0056	BRAF	口腔拭子;新鲜手术组织;	Fresh
PM00G19AL0105	BRAF TERT RET ACBD5	口腔拭子;新鲜手术组织;	Fresh
PM00G19AL0118	BRAF RET CCDC6	口腔拭子;新鲜手术组织;	Fresh
PM00G18AY0114	BRAF	口腔拭子;新鲜手术组织;	Fresh
PM00G18AY0112	BRAF	口腔拭子;新鲜手术组织;	Fresh
PM00G18AY0128	BRAF	口腔拭子;新鲜手术组织;	Fresh
PM00G19AY0044	BRAF	口腔拭子;新鲜手术组织;	Fresh
PM00G18AY0123	RET CCDC6	口腔拭子;新鲜手术组织;	Fresh
PM00G19AY0036	HRAS	口腔拭子;新鲜手术组织;	Fresh
PM00G19AY0078	RET CCDC6	口腔拭子;新鲜手术组织;	Fresh
PM00G19AY0077	None	口腔拭子;新鲜手术组织;	Fresh
PM00G18AN0528	BRAF	外周血;新鲜手术组织;	Fresh
PM00G19AY0100	BRAF	口腔拭子;新鲜手术组织;	Fresh
PM00G18AN0456	BRAF	外周血;新鲜手术组织;	Fresh
PM00G18AN0469	BRAF	外周血;新鲜手术组织;	Fresh
PM00G18AN0448	BRAF	外周血;新鲜手术组织;	Fresh
PM00G18AN0464	BRAF	外周血;新鲜手术组织;	Fresh
PM00G19AN0238	BRAF	外周血;新鲜手术组织;	Fresh
PM00G19AY0116	BRAF	口腔拭子;新鲜手术组织;	Fresh
PM00G19AN0086	BRAF	外周血;新鲜手术组织;	Fresh
PM00G18AN0318	BRAF	外周血;新鲜手术组织;	Fresh
PM00G18AN0338	BRAF	外周血;新鲜手术组织;	Fresh
PM00G19AN0236	None	外周血;新鲜手术组织;	Fresh
PM00G18AN0512	None	外周血;新鲜手术组织;	Fresh
PM00G19AY0127	BRAF	口腔拭子;新鲜手术组织;	Fresh
PM00G18AS0244	BRAF	手术石蜡切片;	FFPE
PM00G18AS0897	BRAF	口腔拭子;新鲜手术组织;	Fresh
PM00G18AY0101	BRAF	外周血;其他:手术石蜡卷片	FFPE
PM00G18AY0102	None	外周血;新鲜手术组织;	Fresh
PM00G18AS1419	BRAF	口腔拭子;新鲜手术组织;	Fresh
PM00G18AY0092	BRAF	口腔拭子;新鲜手术组织;	Fresh
PM00G18AY0095	BRAF	口腔拭子;其他:手术石蜡卷片	FFPE
PM00G19AS0197	BRAF	口腔拭子;新鲜手术组织;	Fresh
PM00G18AY0097	BRAF	口腔拭子;新鲜手术组织;	Fresh
PM00G19AS0158	BRAF	口腔拭子;新鲜手术组织;	Fresh
PM00G18AY0115	BRAF	新鲜穿刺组织;口腔拭子;	Fresh
PM00G19AS0155	BRAF	口腔拭子;新鲜手术组织;	Fresh
PM00G19AS0154	None	口腔拭子;新鲜手术组织;	Fresh
PM00G18AY0111	RET CCDC6	口腔拭子;新鲜手术组织;	Fresh
PM00G18AY0107	BRAF	口腔拭子;新鲜手术组织;	Fresh
PM00G19AS0088	RET NCOA4	口腔拭子;新鲜手术组织;	Fresh
PM00G19AS0089	None	口腔拭子;新鲜手术组织;	Fresh
PM00G19AS0082	None	口腔拭子;新鲜手术组织;	Fresh
PM00G18AY0122	RET NCOA4	口腔拭子;新鲜手术组织;	Fresh
PM00G19AS0042	BRAF	口腔拭子;新鲜手术组织;	Fresh
PM00G19AS0006	BRAF	口腔拭子;新鲜手术组织;	Fresh
PM00G19AY0038	BRAF	口腔拭子;新鲜手术组织;	Fresh
PM00G19AS0649	BRAF	口腔拭子;新鲜手术组织;	Fresh
PM00G19AS0383	None	口腔拭子;新鲜手术组织;	Fresh
PM00G19AY0034	BRAF	口腔拭子;新鲜手术组织;	Fresh
PM00G19AS0365	BRAF	口腔拭子;新鲜手术组织;	Fresh
PM00G19AY0080	BRAF	口腔拭子;新鲜手术组织;	Fresh
PM00G18AW0648	BRAF	口腔拭子;其他:手术石蜡卷片	FFPE
PM00G19AN0216	BRAF	外周血;新鲜手术组织;	Fresh
PM00G18AN0527	BRAF	外周血;新鲜手术组织;	Fresh
PM00G18AN0525	BRAF	外周血;新鲜手术组织;	Fresh
PM00G18AW0646	BRAF	口腔拭子;其他:手术石蜡卷片	FFPE
PM00G18AW0647	BRAF	口腔拭子;其他:手术石蜡卷片	FFPE
PM00G18AW0804	BRAF	口腔拭子;其他:手术石蜡卷片	FFPE
PM00G18AW0998	BRAF	口腔拭子;其他:手术石蜡卷片	FFPE
PM00G19AW0077	None	口腔拭子;手术石蜡切片;	FFPE
PM00G19AW0999	BRAF	口腔拭子;手术石蜡切片;	FFPE
PM00G19AW0084	BRAF	口腔拭子;手术石蜡切片;	FFPE
PM00G19AW0197	BRAF	口腔拭子;其他:手术石蜡卷片	FFPE
PM00G19AW0195	BRAF	口腔拭子;其他:手术石蜡卷片	FFPE
PM00G19AW0288	BRAF	口腔拭子;手术石蜡切片;	FFPE
PM00G19AW0194R	BRAF	口腔拭子;其他:手术石蜡卷片	FFPE
PM00G19AW0995	BRAF	其他:手术石蜡卷片	FFPE
PM00G19AN0083	BRAF	外周血;新鲜手术组织;	Fresh
PM00G18AN0322	BRAF	外周血;新鲜手术组织;	Fresh
PM00G19AW0289	BRAF	口腔拭子;其他:手术石蜡卷片	FFPE
PM00G19AW0991	BRAF	口腔拭子;手术石蜡切片;	FFPE
PM00G19AW0992	BRAF	口腔拭子;其他:手术石蜡卷片	FFPE
PM00G19AW0315	BRAF	口腔拭子;其他:手术石蜡卷片	FFPE
PM00G19AW0984	BRAF	口腔拭子;其他:手术石蜡卷片	FFPE
PM00G19AW0408	RET NCOA4	口腔拭子;手术石蜡切片;	FFPE
PM00G19AW0969	BRAF	口腔拭子;其他:手术石蜡卷片	FFPE
PM00G18AW0801	BRAF	口腔拭子;手术石蜡切片;	FFPE
PM00G18AW0800	KRAS	口腔拭子;手术石蜡切片;	FFPE
PM00G18AW0796	BRAF	口腔拭子;手术石蜡切片;	FFPE
PM00G18AE0193	BRAF	新鲜手术组织;	Fresh
PM00G18AE0196	BRAF	新鲜手术组织;	Fresh
PM00G18AE0195	None	新鲜手术组织;	Fresh
PM00G18AE0243	None	新鲜手术组织;	Fresh
PM00G18AE0238	BRAF	外周血;新鲜手术组织;	Fresh
PM00G18AE0267	RET NCOA4 CELF2	外周血;新鲜手术组织;	Fresh
PM00G18AE0259	BRAF	外周血;手术石蜡切片;	FFPE
PM00G18AE0258	BRAF	外周血;新鲜手术组织;	Fresh
PM00G18AN0516	None	外周血;新鲜手术组织;	Fresh
PM00G19AN0222	BRAF	外周血;新鲜手术组织;	Fresh
PM00G18AE0252	BRAF	外周血;新鲜手术组织;	Fresh
PM00G18AE0312	BRAF	外周血;新鲜手术组织;	Fresh
PM00G18AE0303	None	外周血;新鲜手术组织;	Fresh
PM00G19AL0119	BRAF	口腔拭子;新鲜手术组织;	Fresh
PM00G18AS0330	BRAF	手术石蜡切片;	FFPE
PM00G19AL0120	BRAF	口腔拭子;新鲜手术组织;	Fresh
PM00G19AL0117	BRAF	口腔拭子;新鲜手术组织;	Fresh
PM00G19AL0103	BRAF RET C10orf118_15	口腔拭子;新鲜手术组织;	Fresh
PM00G19AL0094	RET CCDC6	口腔拭子;新鲜手术组织;	Fresh
PM00G19AL0099	RET CCDC6	口腔拭子;新鲜手术组织;	Fresh
PM00G19AL0112	RET CCDC6	口腔拭子;新鲜手术组织;	Fresh
PM00G18AS0974	BRAF	新鲜手术组织;	Fresh
PM00G18AS0962	BRAF	新鲜手术组织;	Fresh
PM00G18AS0976	BRAF	手术石蜡切片;	FFPE
PM00G19AL0107	BRAF RET intergenic_JMJD1C_REEP3:RET_12	口腔拭子;手术石蜡切片;	FFPE
PM00G18AS0936	BRAF	新鲜手术组织;	Fresh
PM00G19AL0114	BRAF RET NCOA4	口腔拭子;新鲜手术组织;	Fresh
PM00G18AY0126	BRAF	口腔拭子;新鲜手术组织;	Fresh
PM00G18AS0932	None	新鲜手术组织;	Fresh
PM00G19AY0048	BRAF	口腔拭子;新鲜手术组织;	Fresh
PM00G18AS0917	BRAF	新鲜手术组织;	Fresh
PM00G18AS0915	None	新鲜手术组织;	Fresh
PM00G19AY0045	RET ACBD5	口腔拭子;新鲜手术组织;	Fresh
PM00G19AY0043	BRAF	口腔拭子;新鲜手术组织;	Fresh
PM00G19AY0072	BRAF	口腔拭子;新鲜手术组织;	Fresh
PM00G19AY0106	BRAF	口腔拭子;新鲜手术组织;	Fresh
PM00G19AY0126	BRAF	口腔拭子;新鲜手术组织;	Fresh
PM00G18AY0113	BRAF	口腔拭子;新鲜手术组织;	Fresh
PM00G18AS0876	BRAF	外周血;手术石蜡切片;	FFPE
PM00G19AY0000	RET NCOA4	口腔拭子;新鲜手术组织;	Fresh
PM00G18AS0831	EGFR	新鲜穿刺组织;口腔拭子;	Fresh
PM00G19AY0047	BRAF	口腔拭子;新鲜手术组织;	Fresh
PM00G19AY0032	BRAF	口腔拭子;新鲜手术组织;	Fresh
PM00G19AN0210	BRAF	外周血;新鲜手术组织;	Fresh
PM00G18AS1101	BRAF	口腔拭子;新鲜手术组织;	Fresh
PM00G18AS1102	BRAF	口腔拭子;新鲜手术组织;	Fresh
PM00G18AN0446	BRAF	外周血;新鲜手术组织;	Fresh
PM00G18AN0470	BRAF	外周血;新鲜手术组织;	Fresh
PM00G19AN0069	BRAF	外周血;新鲜手术组织;	Fresh
PM00G18AS1078	None	口腔拭子;新鲜手术组织;	Fresh
PM00G18AS1459	BRAF	口腔拭子;新鲜手术组织;	Fresh
PM00G18AN0529	BRAF	外周血;新鲜手术组织;	Fresh
PM00G18AN0462	BRAF	外周血;新鲜手术组织;	Fresh
PM00G19AN0072	BRAF	外周血;新鲜手术组织;	Fresh
PM00G19AN0207	BRAF	外周血;新鲜手术组织;	Fresh
PM00G18AS1433	KRAS	口腔拭子;手术石蜡切片;	FFPE
PM00G19AN0215	BRAF	外周血;新鲜手术组织;	Fresh
PM00G18AN0337	BRAF	外周血;新鲜手术组织;	Fresh
PM00G18AN0320	BRAF	外周血;新鲜手术组织;	Fresh
PM00G19AS0176	BRAF	口腔拭子;新鲜手术组织;	Fresh
PM00G18AN0340	BRAF	外周血;新鲜手术组织;	Fresh
PM00G19AS0146	BRAF	口腔拭子;新鲜手术组织;	Fresh
PM00G18AN0335	BRAF	外周血;新鲜手术组织;	Fresh
PM00G18AN0314	BRAF	外周血;新鲜手术组织;	Fresh
PM00G19AN0221	RET CCDC6	外周血;新鲜手术组织;	Fresh
PM00G19AS0070	BRAF TERT	口腔拭子;新鲜手术组织;	Fresh
PM00G19AS0069	BRAF	口腔拭子;新鲜手术组织;	Fresh
PM00G19AS0051	BRAF	口腔拭子;手术石蜡切片;	FFPE
PM00G19AS0058	None	口腔拭子;新鲜手术组织;	Fresh
PM00G19AS0055	None	口腔拭子;新鲜手术组织;	Fresh
PM00G19AN0214	None	外周血;新鲜手术组织;	Fresh
PM00G19AN0089	None	外周血;新鲜手术组织;	Fresh
PM00G19AN0078	None	外周血;新鲜手术组织;	Fresh
PM00G19AN0070	None	外周血;新鲜手术组织;	Fresh
PM00G18AN0447	None	外周血;新鲜手术组织;	Fresh
PM00G19AS0691	BRAF	口腔拭子;手术石蜡切片;	FFPE
PM00G19AS0693	None	口腔拭子;新鲜手术组织;	Fresh
PM00G19AS0684	BRAF	口腔拭子;新鲜手术组织;	Fresh
PM00G19AS0687	None	口腔拭子;新鲜手术组织;	Fresh
PM00G18AS0332	BRAF	手术石蜡切片;	FFPE
PM00G18AS0664	BRAF	手术石蜡切片;	FFPE
PM00G18AS0959	BRAF	新鲜手术组织;	Fresh
PM00G19AS0634	BRAF	口腔拭子;新鲜手术组织;	Fresh
PM00G18AS0909	BRAF	新鲜手术组织;	Fresh
PM00G19AS0617	BRAF	口腔拭子;新鲜手术组织;	Fresh
PM00G18AS1112	None	口腔拭子;新鲜手术组织;	Fresh
PM00G19AS0616	BRAF	口腔拭子;新鲜手术组织;	Fresh
PM00G19AS0178	BRAF	口腔拭子;新鲜手术组织;	Fresh
PM00G19AS0302	BRAF	口腔拭子;手术石蜡切片;	FFPE
PM00G19AS0368	BRAF	口腔拭子;新鲜手术组织;	Fresh
PM00G19AS0367	BRAF	口腔拭子;新鲜手术组织;	Fresh
PM00G19AS0017	BRAF	口腔拭子;新鲜手术组织;	Fresh
PM00G19AS0015	BRAF	口腔拭子;新鲜手术组织;	Fresh
PM00G19AS0658	None	口腔拭子;新鲜手术组织;	Fresh
PM00G18AE0219	BRAF	手术石蜡切片;	FFPE
PM00G18AE0180	BRAF	口腔拭子;手术石蜡切片;	FFPE
PM00G18AE0177	BRAF	口腔拭子;手术石蜡切片;	FFPE
PM00G18AE0406	BRAF	口腔拭子;手术石蜡切片;	FFPE
PM00G18AY0125	BRAF	口腔拭子;新鲜手术组织;	Fresh
PM00G18AE0184	BRAF	口腔拭子;手术石蜡切片;	FFPE
PM00G19AY0031	BRAF	口腔拭子;新鲜手术组织;	Fresh
